# Supplementary material for: pKaH values and θH angles of phosphanes to predict their electronic and steric parameters
Source: Royal Society of Chemistry journal article supplement (doi:10.1039/d4dt01430h), 2024-01-01
Supplement: d4dt01430h1.pdf [file d4dt01430h1.pdf]

## Contents

|                                                                           |     |
|---------------------------------------------------------------------------|-----|
| Additional correlations .....                                             | S2  |
| p <i>K</i> <sub>a</sub> measurements .....                                | S4  |
| UV-Vis spectra .....                                                      | S6  |
| NMR spectra.....                                                          | S11 |
| Computational methods.....                                                | S19 |
| 4-(Ph-N=N)-C <sub>6</sub> H <sub>4</sub> -N=P1(dma) <sub>2</sub> Ph ..... | S26 |

## Additional correlations

Parametrisation correlation plots and equations according to Table 2 in the main text.

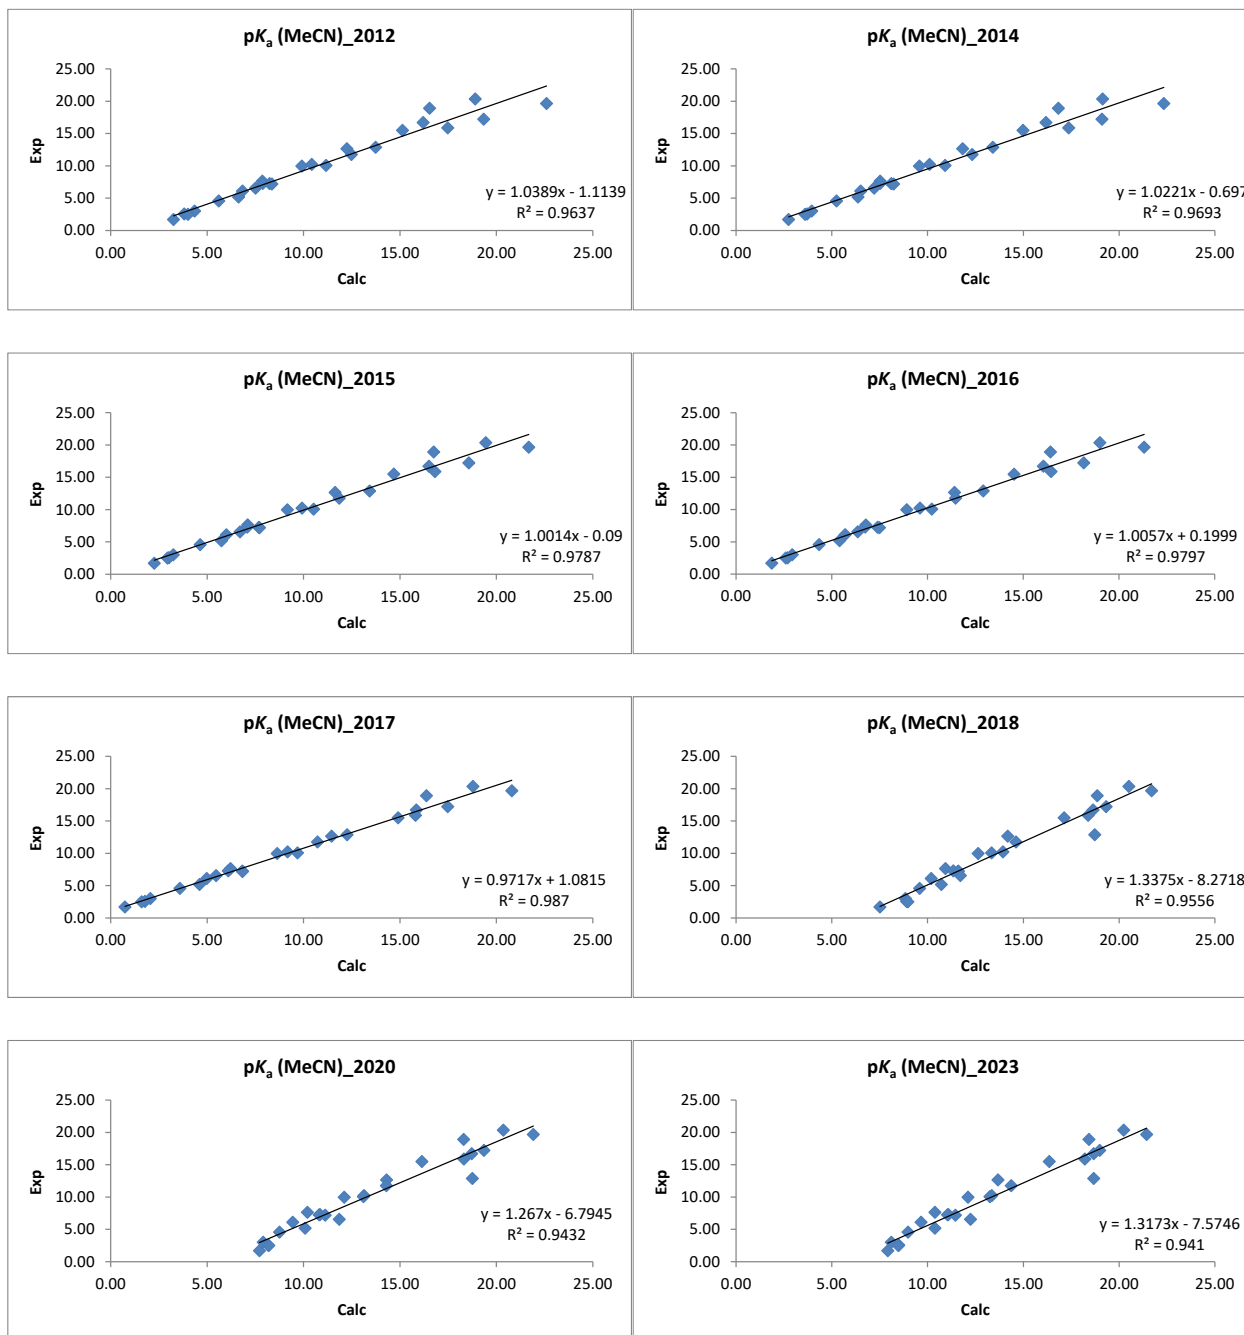

Correlation eq 5 in the main text without any excluded datapoints.

$$\text{TEP} = -1.227(0.099) \cdot \text{p}K_{\text{aH}} + 2079(1.1) \quad (\text{S1})$$

$n = 23; R^2 = 0.880; S = 2.84$

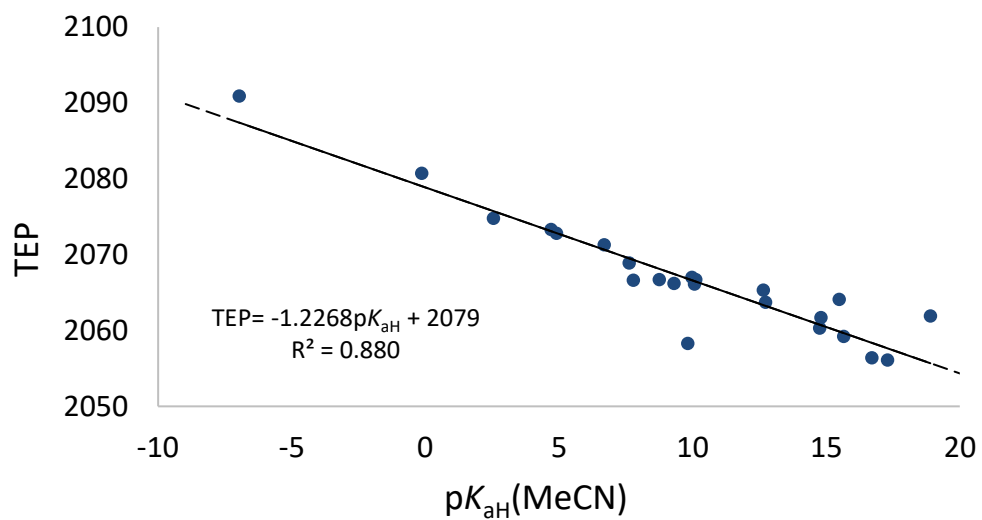

$pK_a$  measurements

**Table S1.** Results of  $pK_{aH}$  measurements in MeCN.

| Base (B)                                                                    | Reference Base (RB)                                                                          | $pK_{aH}(\text{RB})^a$ | $\Delta pK_{aH}$ | $pK_{aH}(\text{B})$ | Assigned $pK_{aH}$ |
|-----------------------------------------------------------------------------|----------------------------------------------------------------------------------------------|------------------------|------------------|---------------------|--------------------|
| PMe <sub>3</sub>                                                            | Pyridine                                                                                     | 12.53                  | -0.37            | 12.90               | <b>12.87</b>       |
|                                                                             | 2-Me-Pyridine                                                                                | 13.28                  | 0.40             | 12.88               |                    |
|                                                                             | 4-MeO-Aniline                                                                                | 11.87                  | -0.95            | 12.82               |                    |
|                                                                             | [2,4,6-(MeO) <sub>3</sub> -C <sub>6</sub> H <sub>2</sub> ]Ph <sub>2</sub> P                  | 11.76                  | -1.12            | 12.88               |                    |
| [2,4,6-(MeO) <sub>3</sub> -C <sub>6</sub> H <sub>2</sub> ]Ph <sub>2</sub> P | Pyridine                                                                                     | 12.53                  | 0.77             | 11.76               | <b>11.76</b>       |
|                                                                             | PMe <sub>3</sub>                                                                             | 12.87                  | 1.12             | 11.75               |                    |
|                                                                             | 4-MeO-Aniline                                                                                | 11.87                  | 0.11             | 11.76               |                    |
| (3-MeO-C <sub>6</sub> H <sub>4</sub> ) <sub>3</sub> P                       | 2,5-Cl <sub>2</sub> -Aniline                                                                 | 6.23                   | -1.03            | 7.26                | <b>7.25</b>        |
|                                                                             | 2-Cl-Pyridine                                                                                | 6.79                   | -0.46            | 7.25                |                    |
|                                                                             | 2,6-(MeO) <sub>2</sub> -Pyridine                                                             | 7.65                   | 0.41             | 7.24                |                    |
| [3,5-(MeO) <sub>2</sub> -C <sub>6</sub> H <sub>3</sub> ] <sub>3</sub> P     | 2,5-Cl <sub>2</sub> -Aniline                                                                 | 6.23                   | -0.97            | 7.20                | <b>7.19</b>        |
|                                                                             | 2-Cl-Pyridine                                                                                | 6.79                   | -0.41            | 7.20                |                    |
|                                                                             | 2,6-(MeO) <sub>2</sub> -Pyridine                                                             | 7.65                   | 0.44             | 7.21                |                    |
|                                                                             | NaphtPh <sub>2</sub> P                                                                       | 7.29                   | 0.14             | 7.15                |                    |
| [2,4,6-(MeO) <sub>3</sub> -C <sub>6</sub> H <sub>2</sub> ] <sub>2</sub> PhP | 2-NO <sub>2</sub> -4-CF <sub>3</sub> -C <sub>6</sub> H <sub>3</sub> -N=P <sub>1</sub> (pyrr) | 16.54                  | 0.65             | 15.89               | <b>15.87</b>       |
|                                                                             | 2,3-(NH <sub>2</sub> ) <sub>2</sub> -Pyridine                                                | 15.26                  | -0.53            | 15.79               |                    |
|                                                                             | 2,4,6-Me <sub>3</sub> -Pyridine                                                              | 15.00                  | -0.92            | 15.92               |                    |
|                                                                             | [2,6-(MeO) <sub>2</sub> -C <sub>6</sub> H <sub>3</sub> ] <sub>3</sub> P                      | 17.23                  | 1.37             | 15.86               |                    |

|                                                                           |                                                                                                                  |       |       |       |              |
|---------------------------------------------------------------------------|------------------------------------------------------------------------------------------------------------------|-------|-------|-------|--------------|
| [2,4,6-(MeO) <sub>3</sub> -C <sub>6</sub> H <sub>2</sub> ] <sub>3</sub> P | 4-CF <sub>3</sub> -C <sub>6</sub> H <sub>4</sub> -N=P <sub>1</sub> (pyrr)                                        | 20.25 | 0.55  | 19.70 | <b>19.66</b> |
|                                                                           | 2-Cl-C <sub>6</sub> H <sub>4</sub> -N=P <sub>1</sub> (pyrr)                                                      | 20.19 | 0.57  | 19.62 |              |
|                                                                           | 2-Cl-C <sub>6</sub> H <sub>4</sub> -N=P <sub>1</sub> (dma)                                                       | 19.10 | -0.55 | 19.65 |              |
| PCyPh <sub>2</sub>                                                        | 2-Me-Aniline                                                                                                     | 10.49 | 0.27  | 10.22 | <b>10.23</b> |
|                                                                           | 2-MeO-Pyridine                                                                                                   | 9.94  | -0.30 | 10.24 |              |
|                                                                           | 1-Naphtylamine                                                                                                   | 9.78  | -0.46 | 10.24 |              |
| 1-NaphtPh <sub>2</sub> P                                                  | 2,6-(MeO) <sub>2</sub> -Pyridine                                                                                 | 7.65  | 0.39  | 7.26  | <b>7.29</b>  |
|                                                                           | 2-Cl-Pyridine                                                                                                    | 6.79  | -0.48 | 7.27  |              |
|                                                                           | [3,5-(MeO) <sub>2</sub> -C <sub>6</sub> H <sub>3</sub> ] <sub>3</sub> P                                          | 7.20  | -0.14 | 7.34  |              |
| [2,6-(MeO) <sub>2</sub> -C <sub>6</sub> H <sub>3</sub> ] <sub>3</sub> P   | 2-NO <sub>2</sub> -4-CF <sub>3</sub> -C <sub>6</sub> H <sub>3</sub> -N=P <sub>1</sub> (pyrr)                     | 16.54 | -0.68 | 17.22 | <b>17.23</b> |
|                                                                           | [2,4,6-(MeO) <sub>3</sub> -C <sub>6</sub> H <sub>2</sub> ] <sub>2</sub> PhP                                      | 15.87 | -1.37 | 17.24 |              |
|                                                                           | 2-NO <sub>2</sub> -5-Cl-C <sub>6</sub> H <sub>3</sub> -N=P <sub>1</sub> (pyrr)                                   | 17.28 | 0.05  | 17.23 |              |
| P(dma) <sub>3</sub>                                                       | 2-Cl-C <sub>6</sub> H <sub>4</sub> -N=P <sub>1</sub> (dma)                                                       | 19.10 | -0.20 | 18.90 | <b>18.9</b>  |
|                                                                           | 2,6-Cl <sub>2</sub> -C <sub>6</sub> H <sub>3</sub> -N=P <sub>1</sub> (pyrr)                                      | 18.56 | 0.40  | 18.96 |              |
|                                                                           | 4-(4-dma-C <sub>6</sub> H <sub>4</sub> -N=N)-C <sub>6</sub> H <sub>4</sub> P <sub>1</sub> (pyrr) <sub>2</sub> Ph | 19.04 | -0.27 | 18.77 |              |
| P(pyrr) <sub>3</sub>                                                      | 4-(Ph-N=N)-C <sub>6</sub> H <sub>4</sub> P <sub>1</sub> (pyrr) <sub>3</sub>                                      | 20.27 | 0.02  | 20.29 | <b>20.35</b> |
|                                                                           | Ph-N=P <sub>1</sub> (dma) <sub>3</sub>                                                                           | 21.26 | -0.93 | 20.33 |              |
|                                                                           | 2-Cl-C <sub>6</sub> H <sub>4</sub> -N=P <sub>1</sub> (pyrr)                                                      | 20.19 | 0.20  | 20.39 |              |
|                                                                           | [2,4,6-(MeO) <sub>3</sub> -C <sub>6</sub> H <sub>2</sub> ] <sub>3</sub> P                                        | 19.66 | 0.74  | 20.40 |              |
| PCy <sub>3</sub>                                                          | 2-NO <sub>2</sub> -4-CF <sub>3</sub> -C <sub>6</sub> H <sub>3</sub> -N=P <sub>1</sub> (pyrr) <sub>3</sub>        | 16.54 | 0.18  | 16.72 | <b>16.70</b> |
|                                                                           | 2-NO <sub>2</sub> -5-Cl-C <sub>6</sub> H <sub>3</sub> -N=P <sub>1</sub> (pyrr) <sub>3</sub>                      | 17.28 | -0.58 | 16.70 |              |
|                                                                           | 2-NO <sub>2</sub> -4-Cl-C <sub>6</sub> H <sub>3</sub> -N=P <sub>1</sub> (pyrr) <sub>3</sub>                      | 17.70 | -1.01 | 16.69 |              |

<sup>a</sup> The pK<sub>aH</sub> values of reference bases are from ref 44.

## UV-Vis spectra

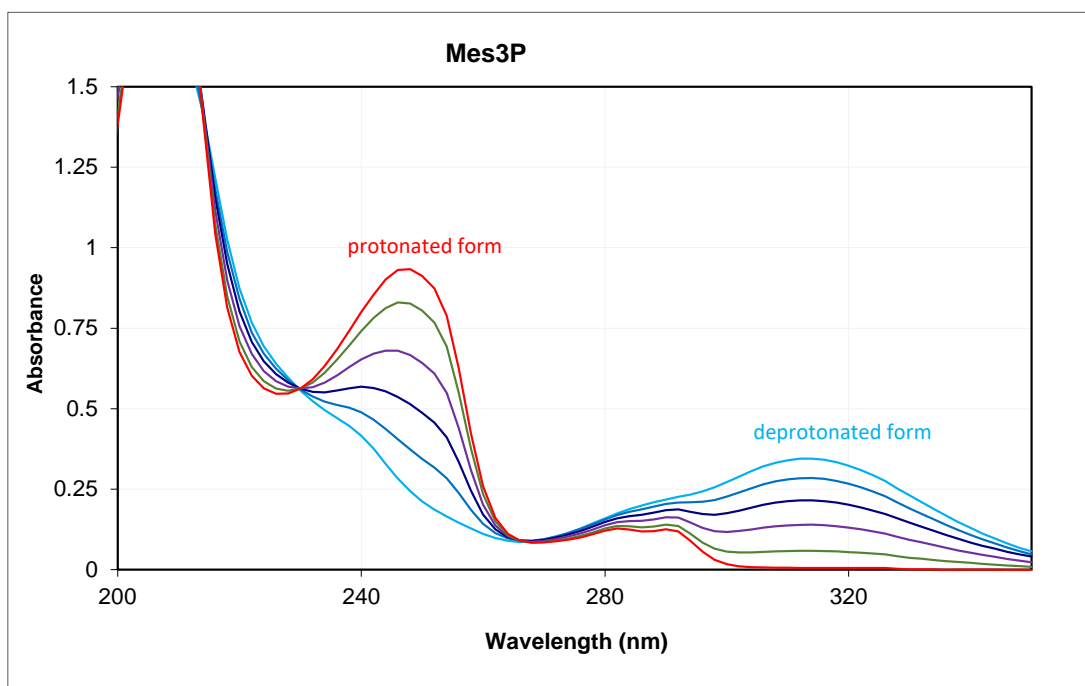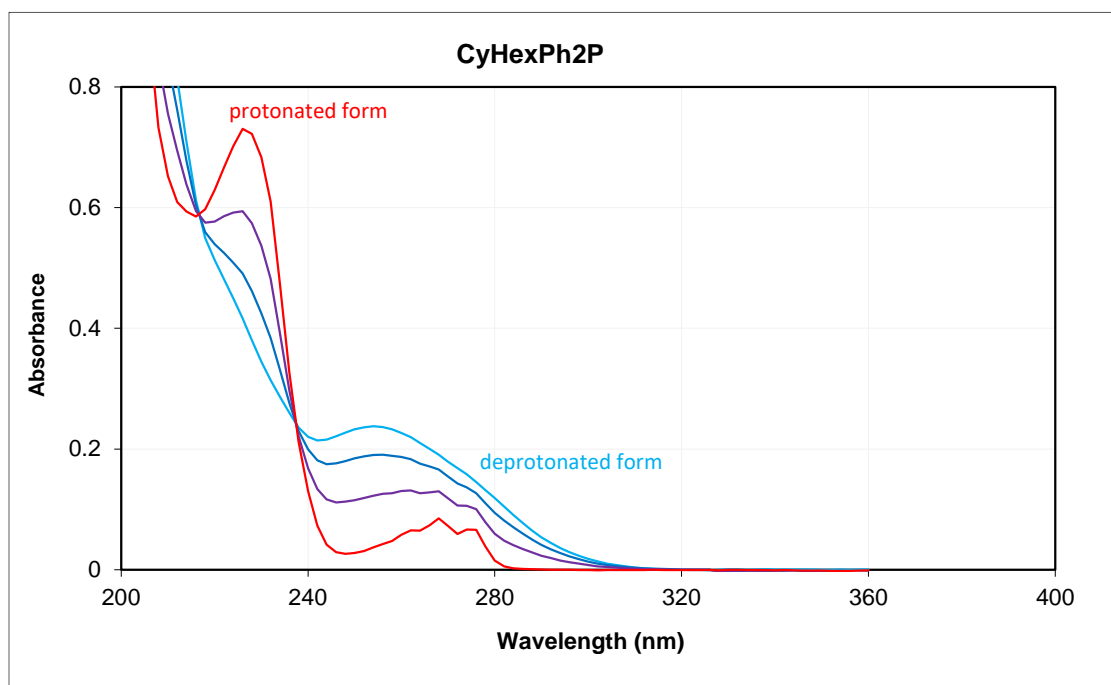

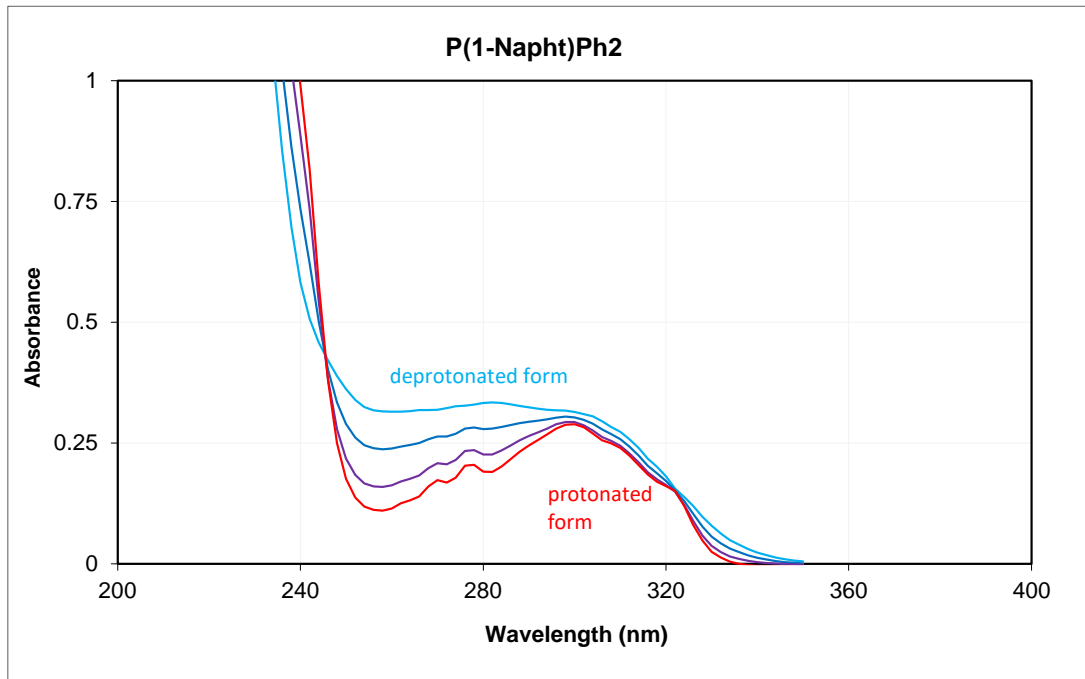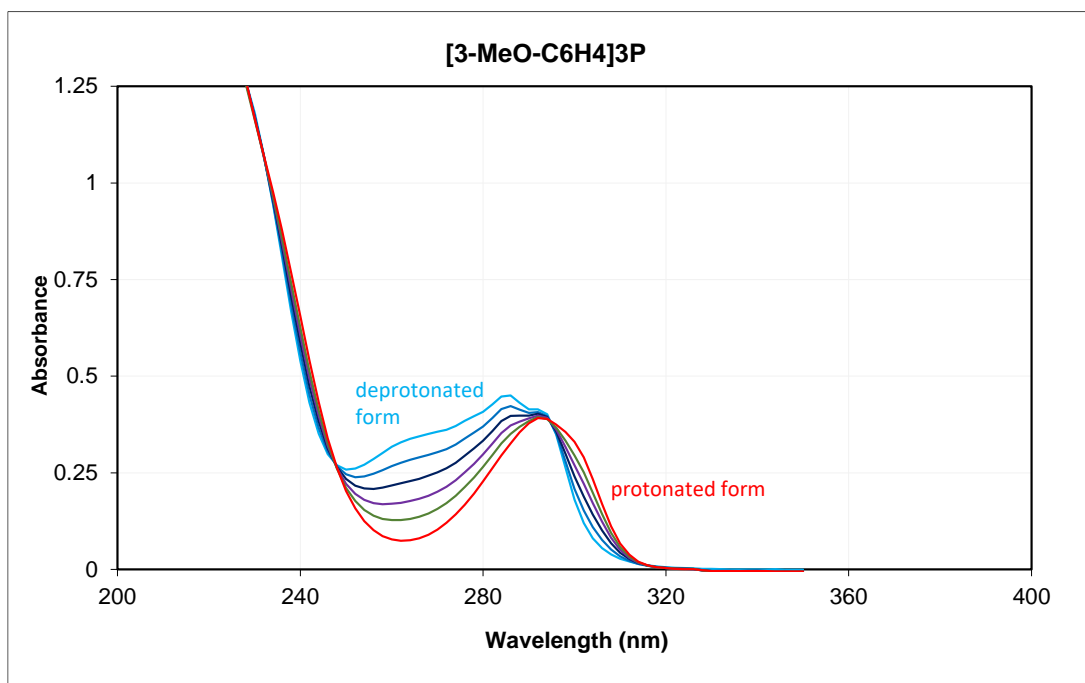

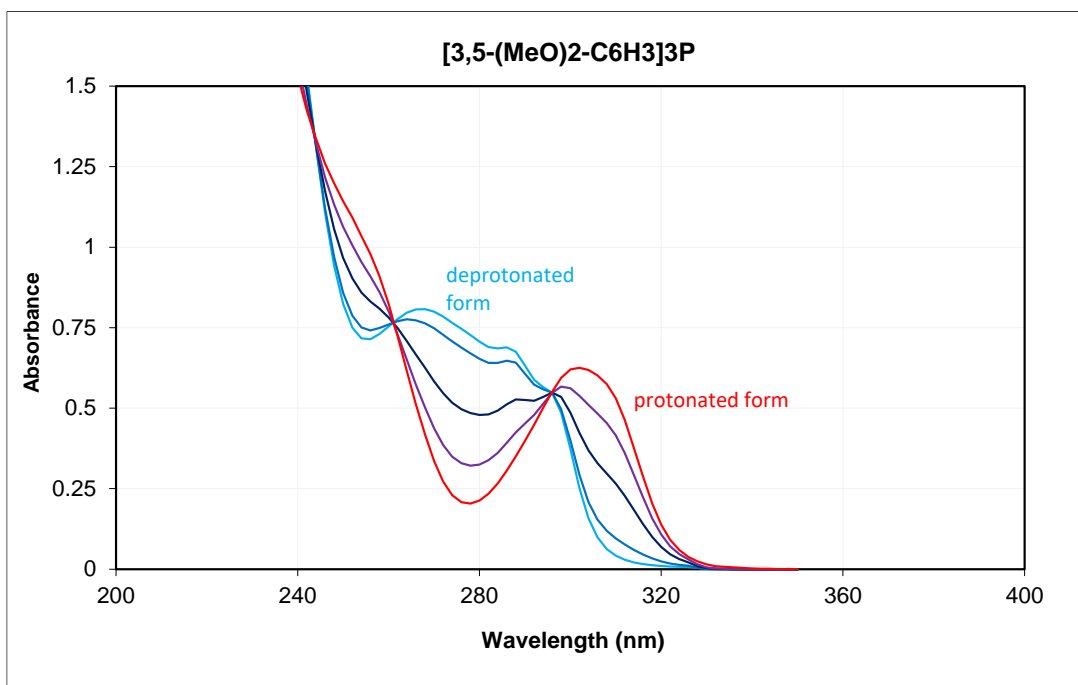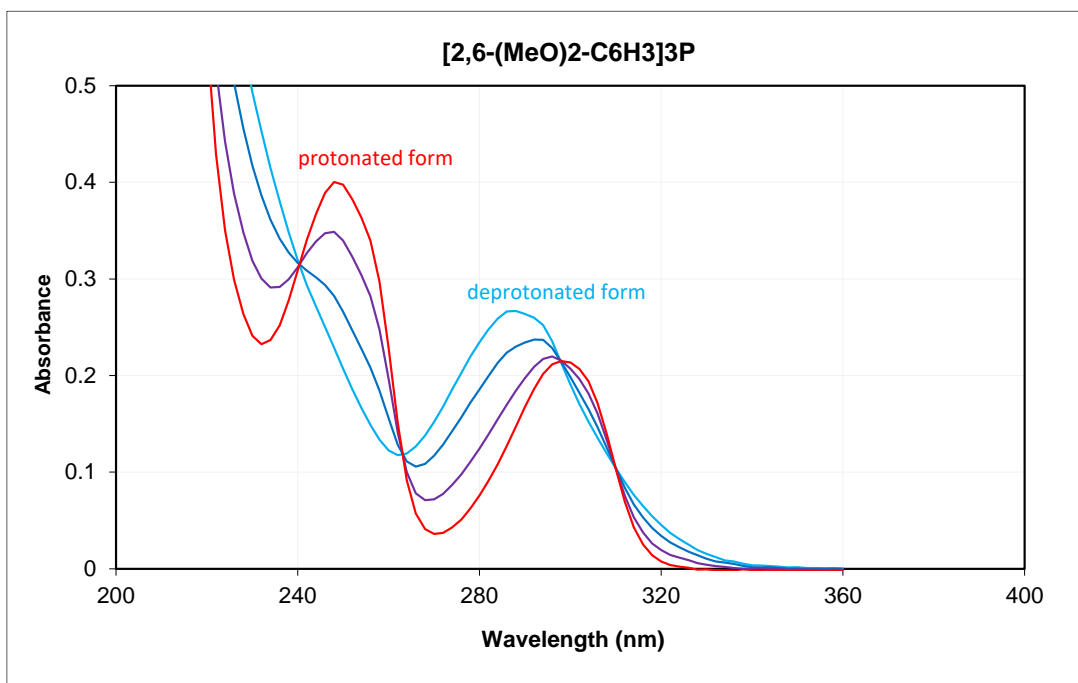



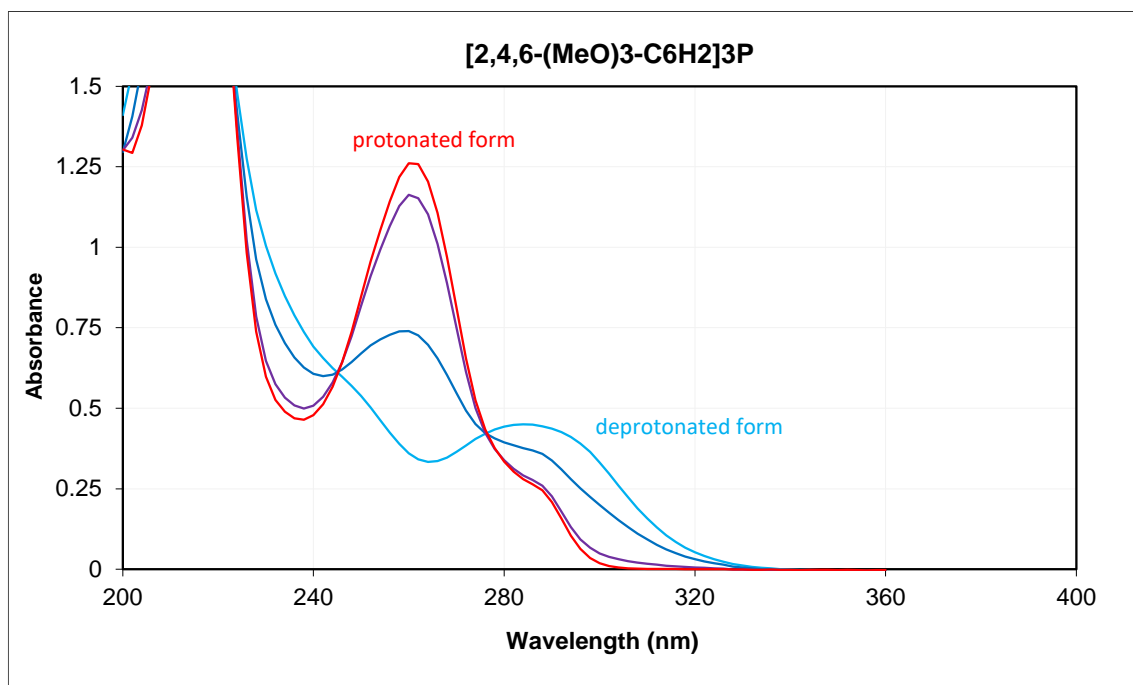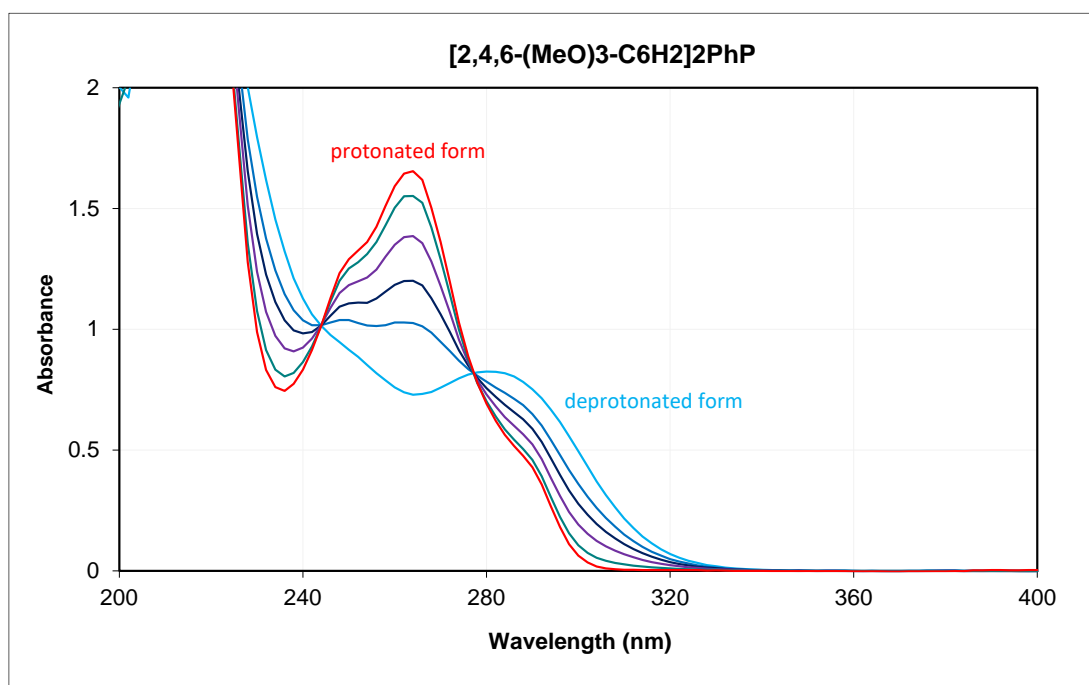

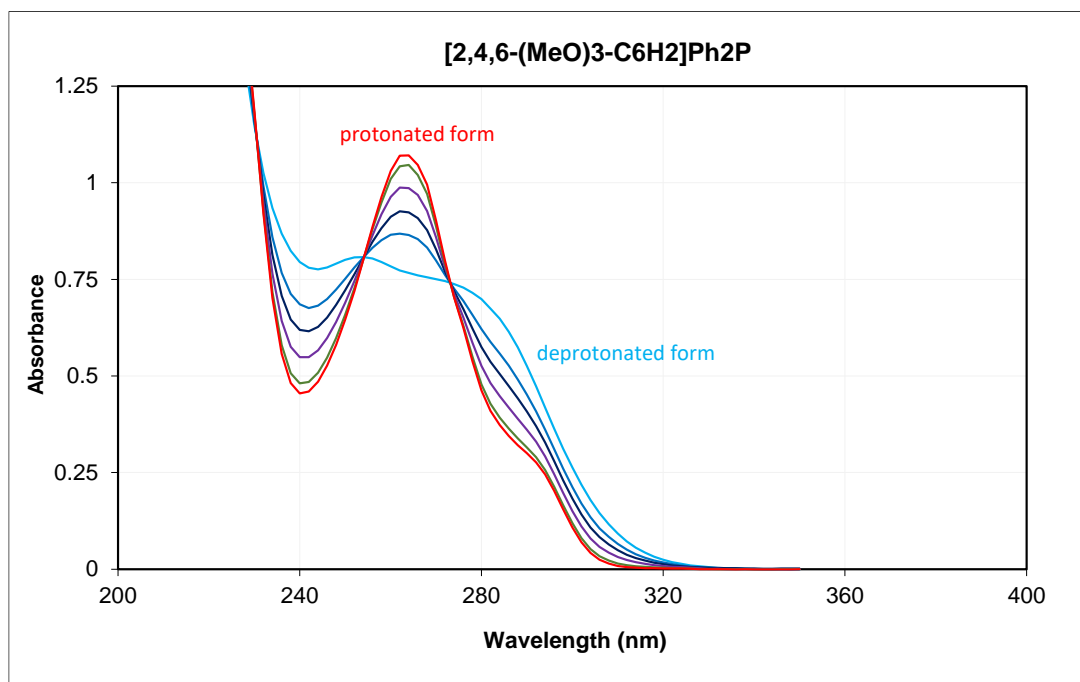

# NMR spectra

231018\_Ppyrr3\_titration 1 1 C:\Users\STM\Desktop\Marta\NMR

A:  $\text{P}(\text{pyrr})_3$   
B:  $4\text{-(Ph-N=N)-C}_6\text{H}_4\text{P}_1(\text{pyrr})_3$   
C:  $\text{Ph-N}=\text{P}_1(\text{dma})_3$

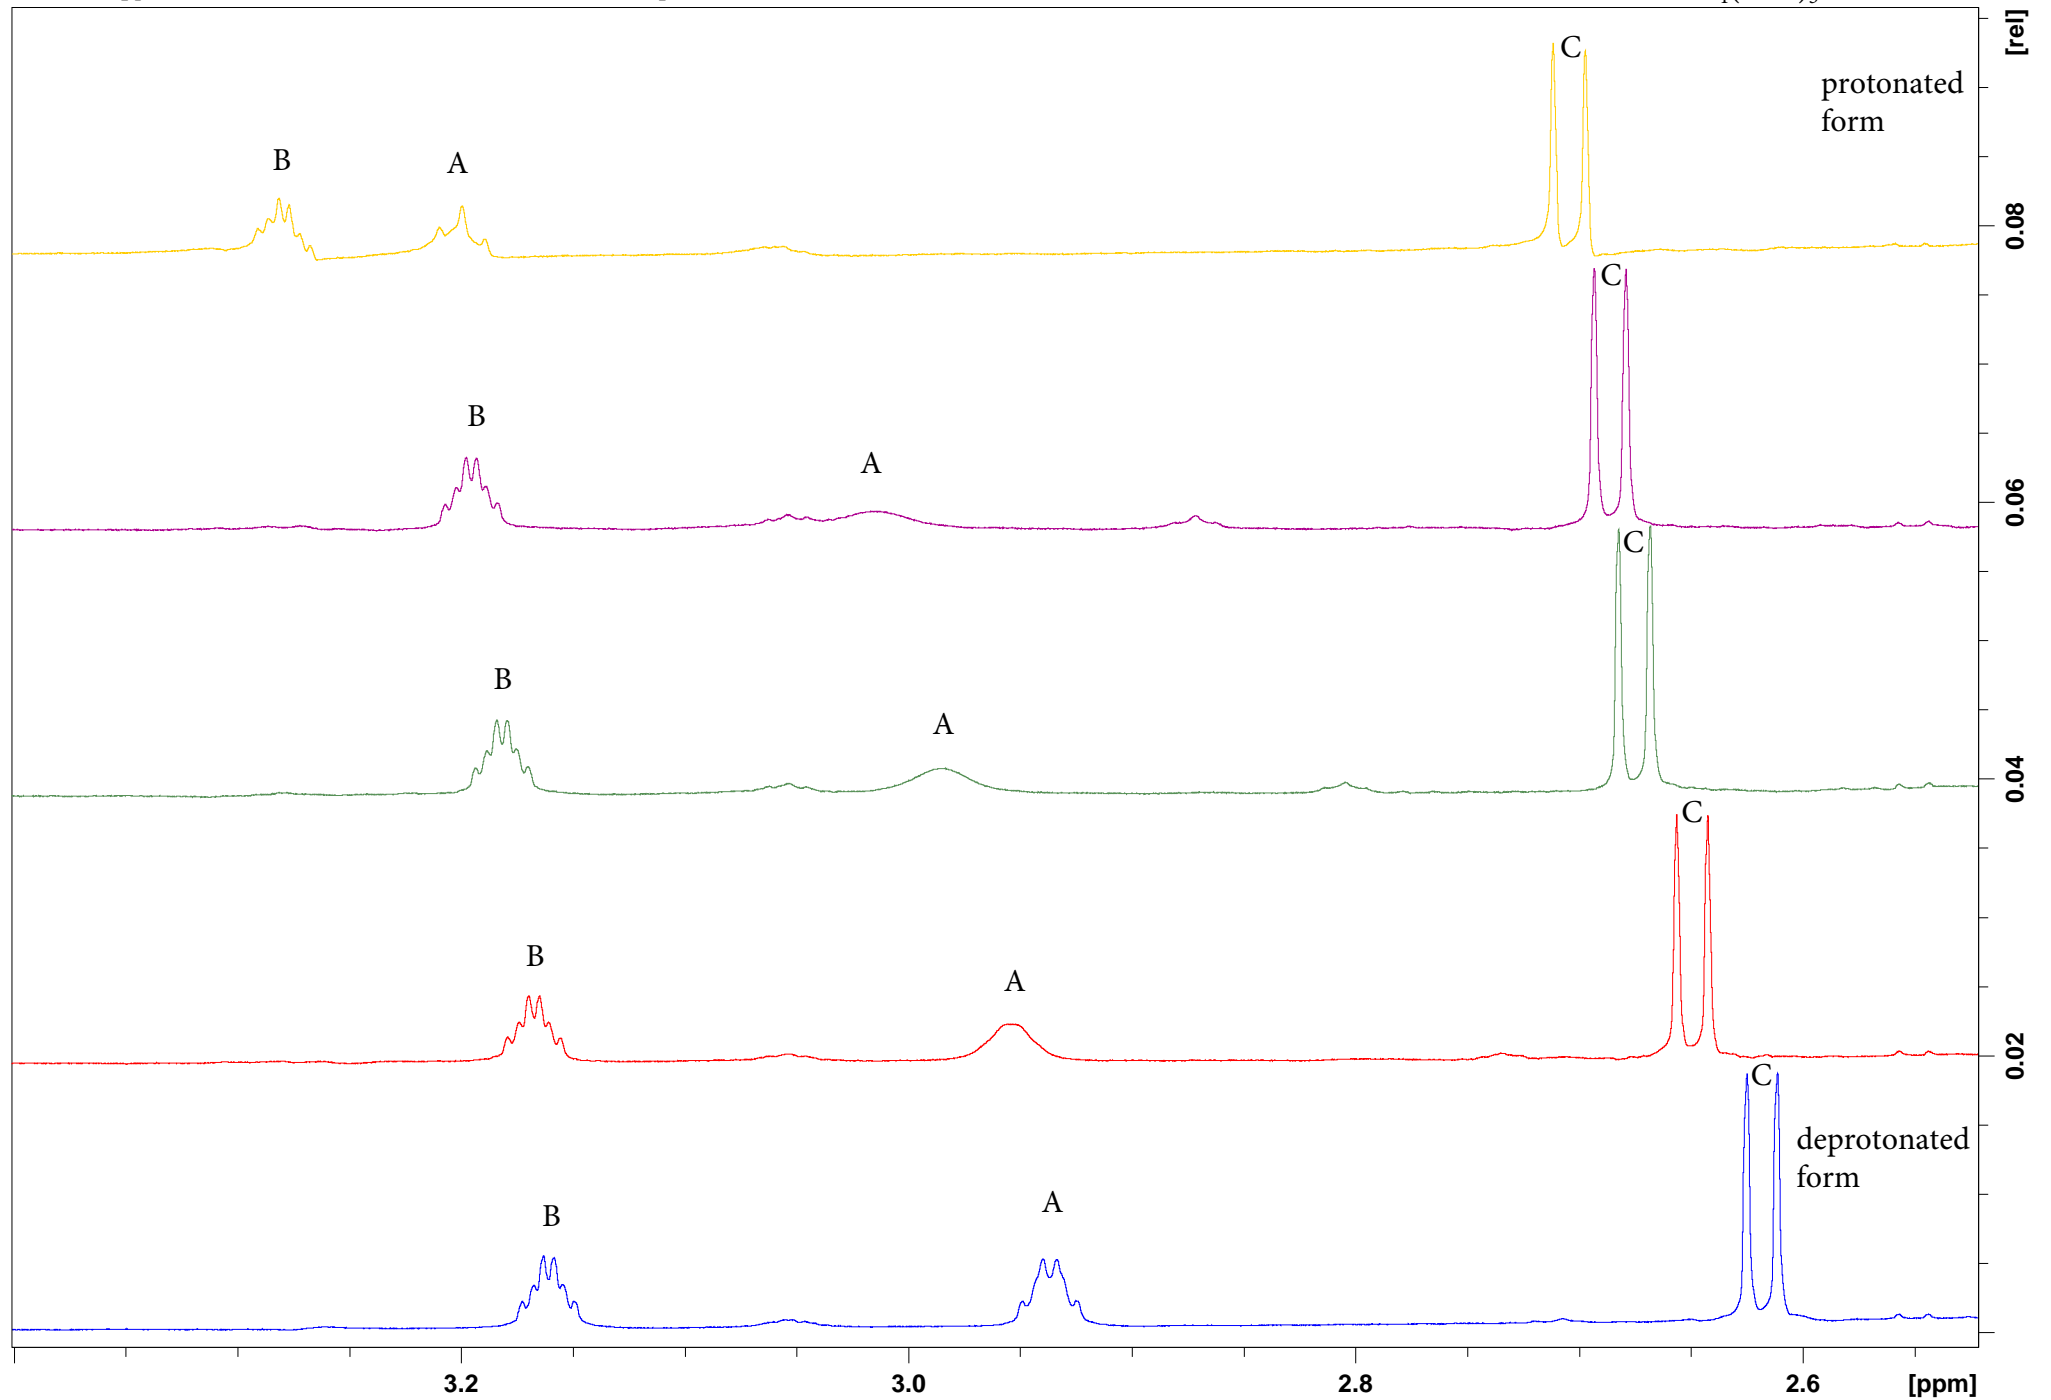

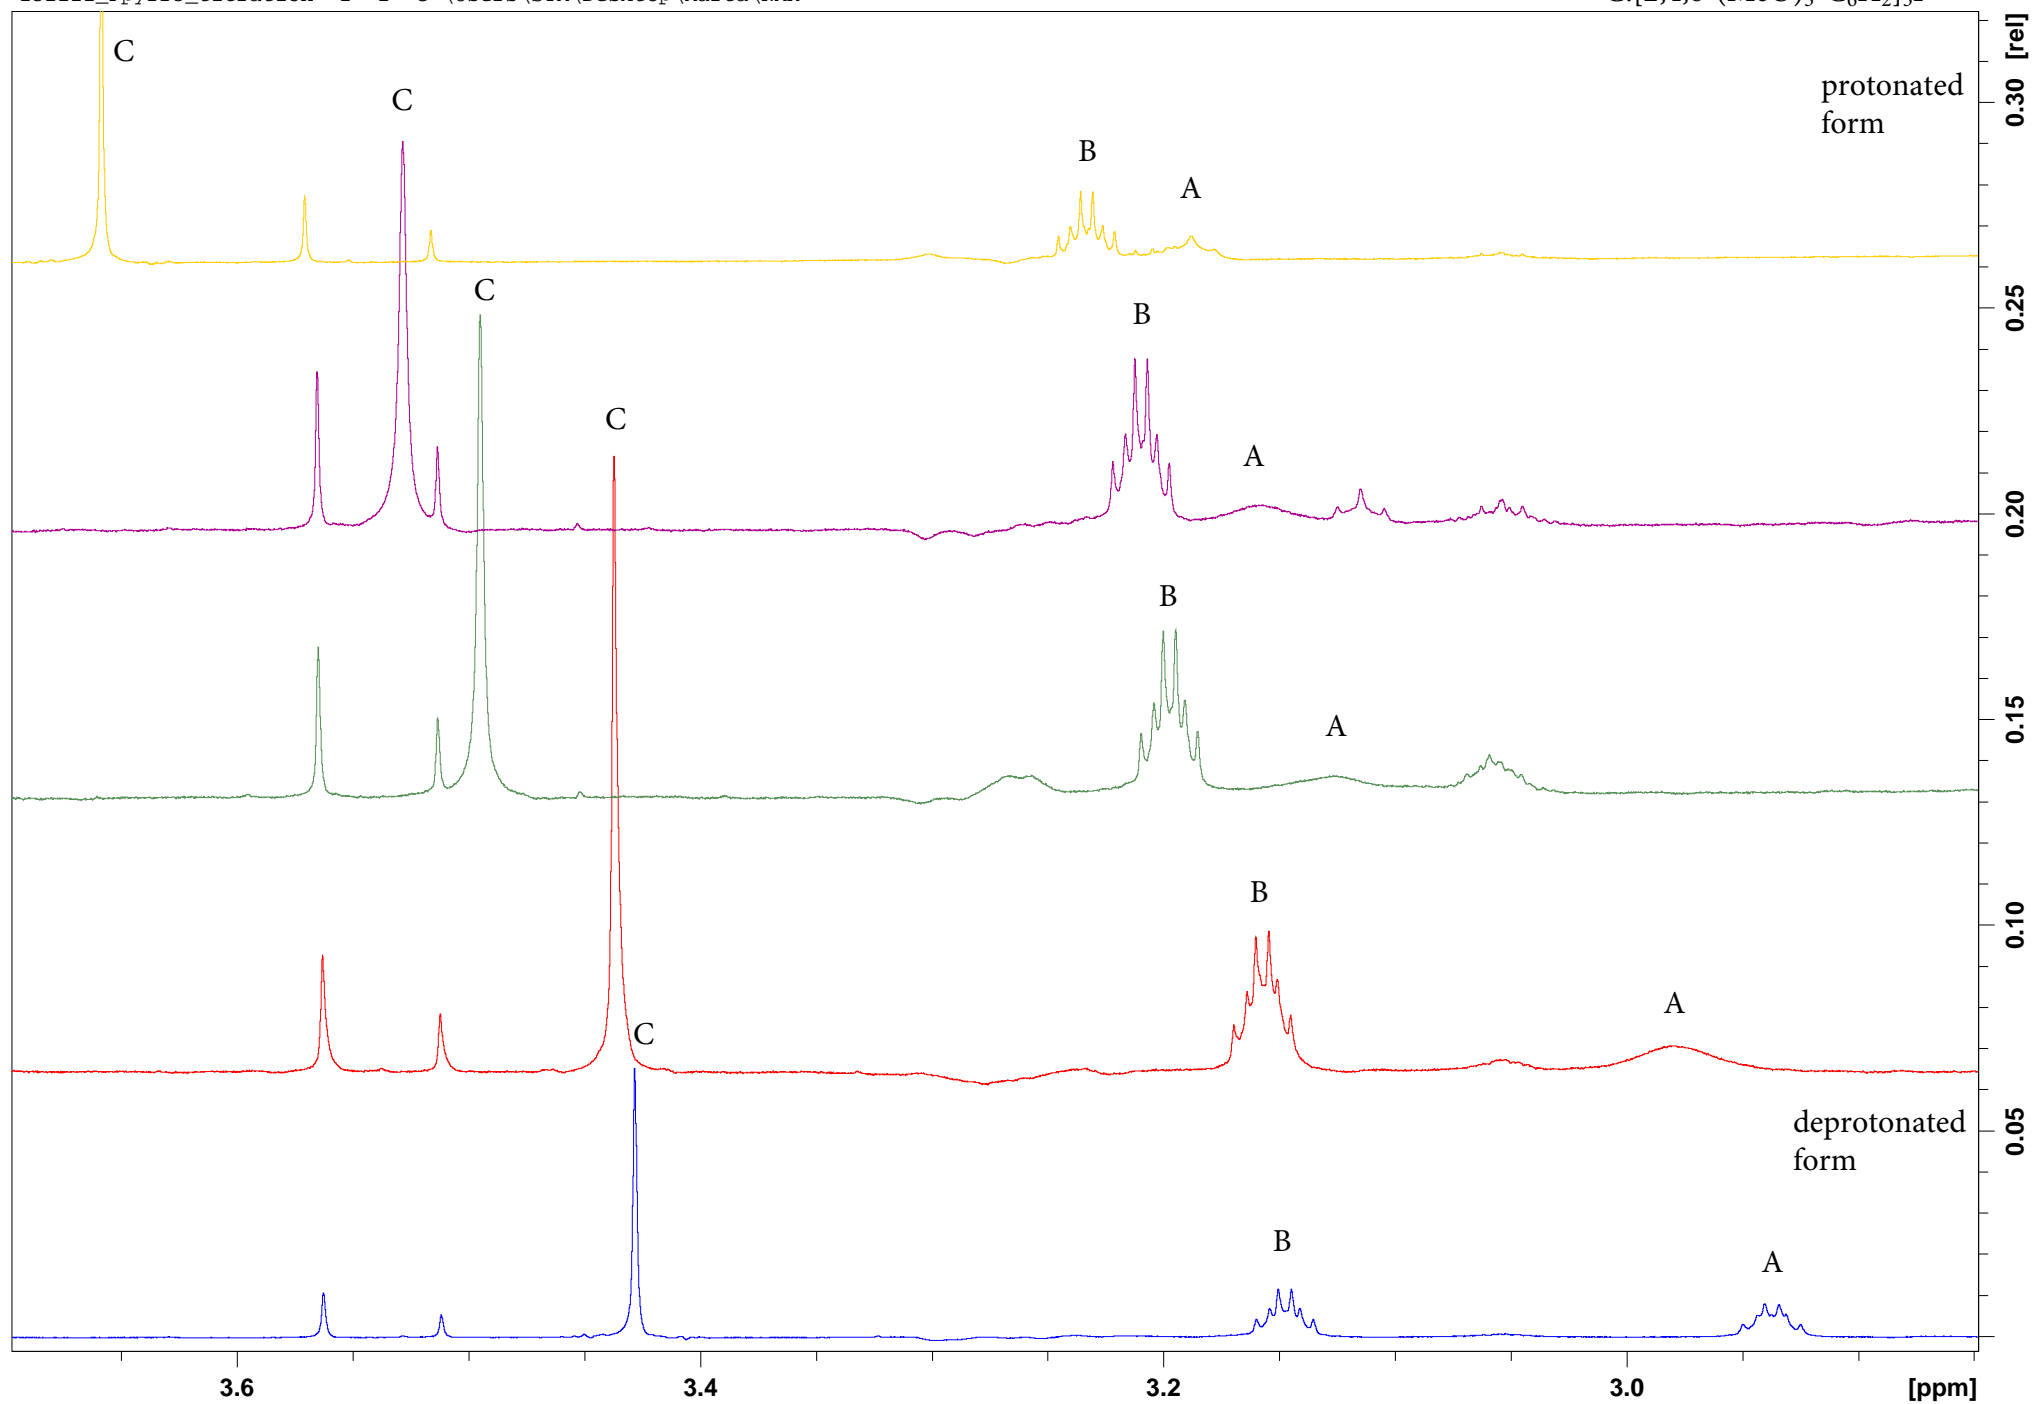

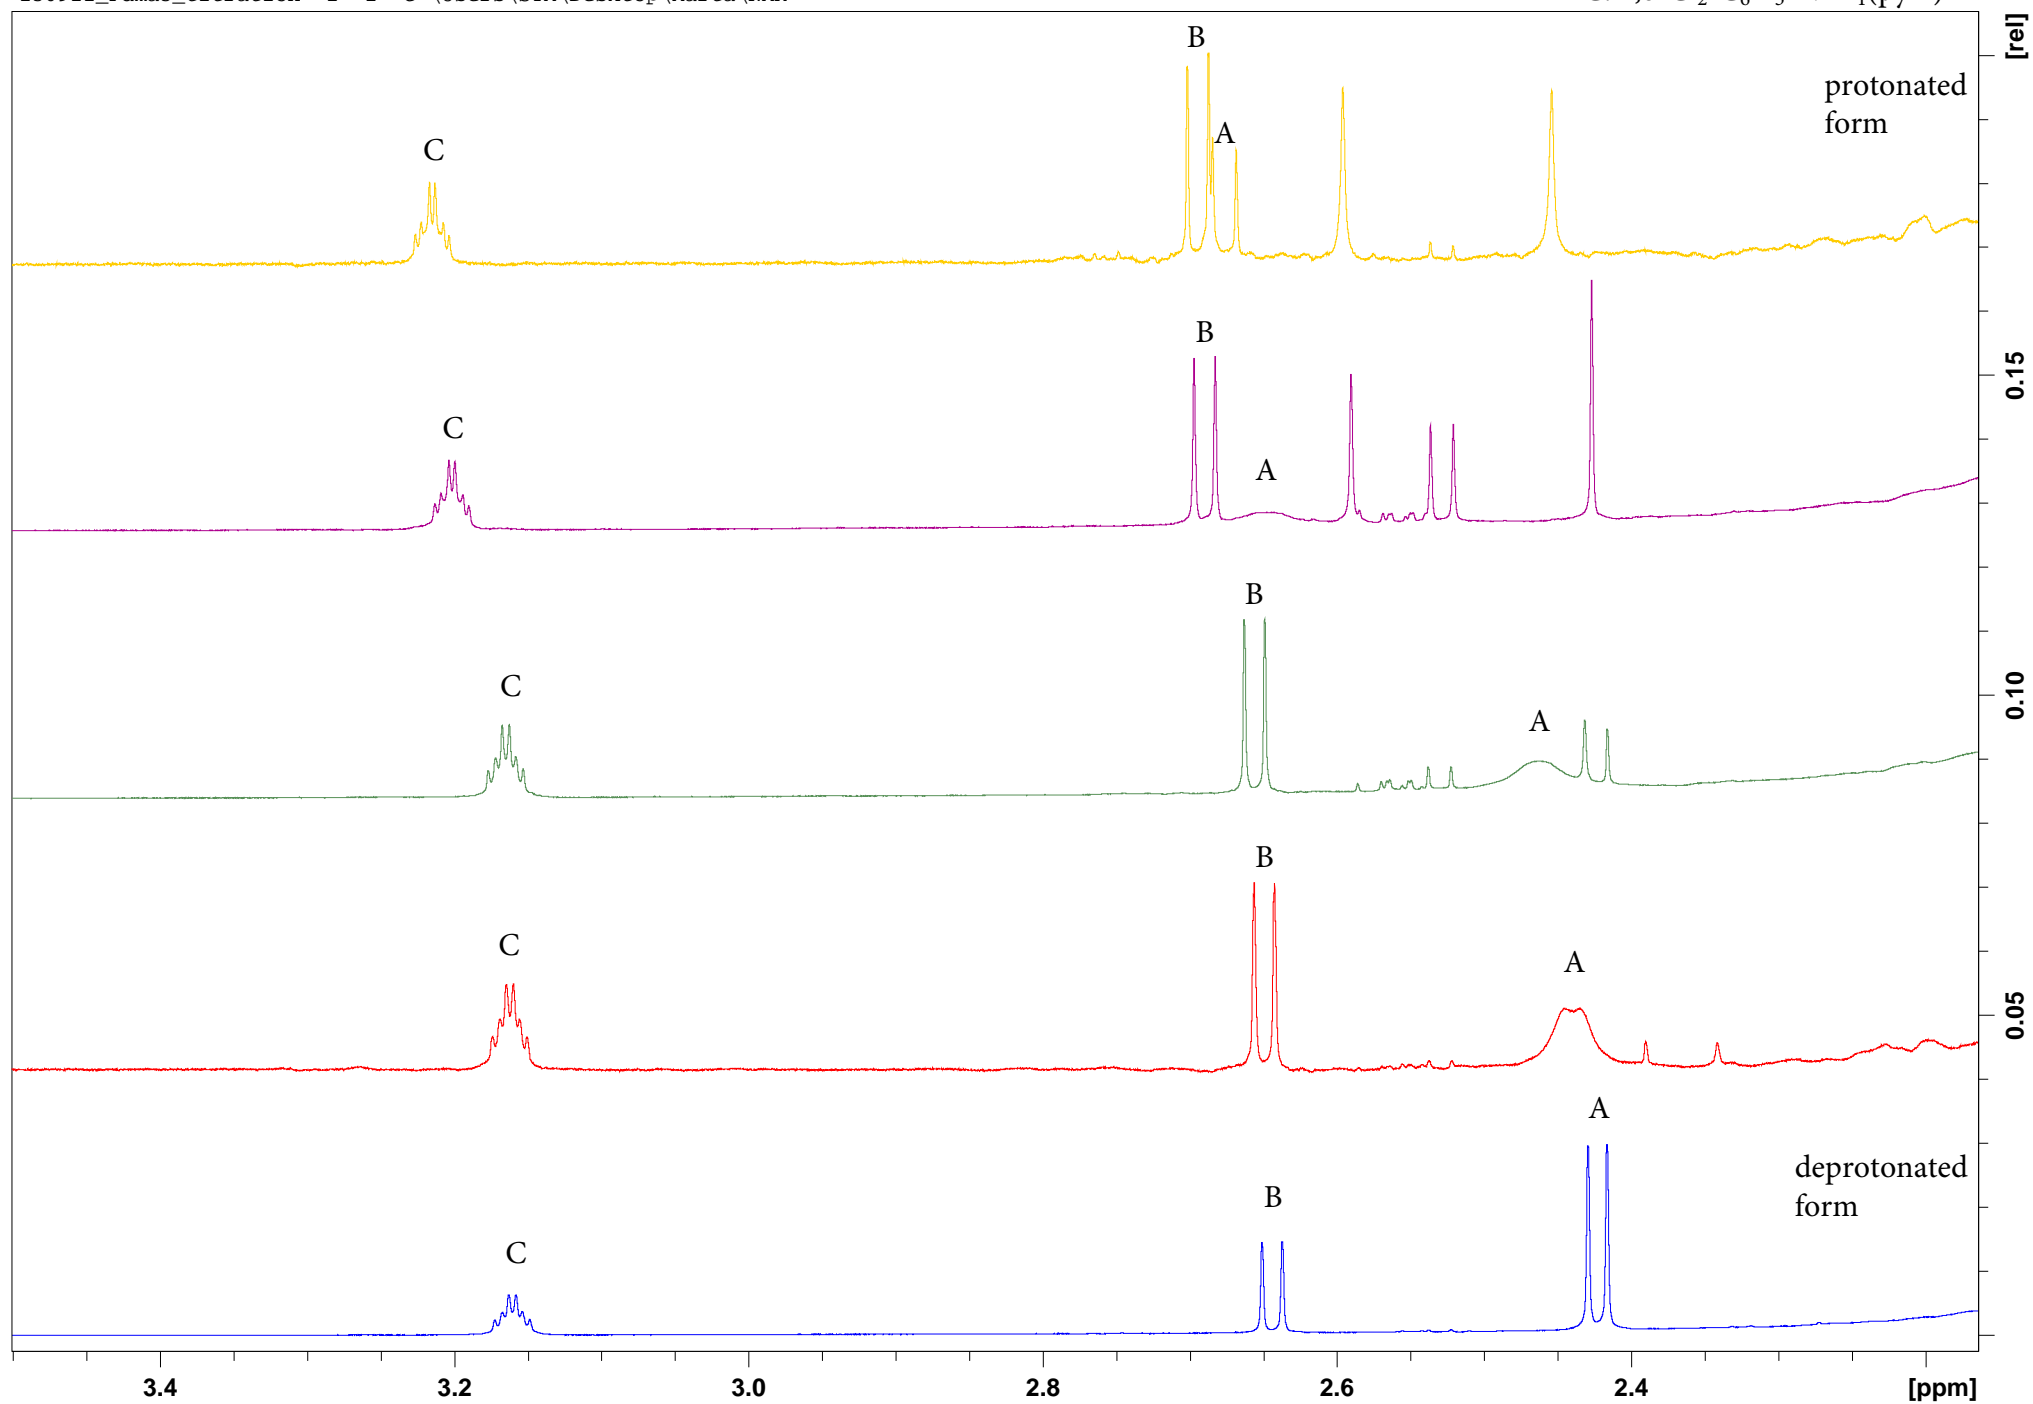

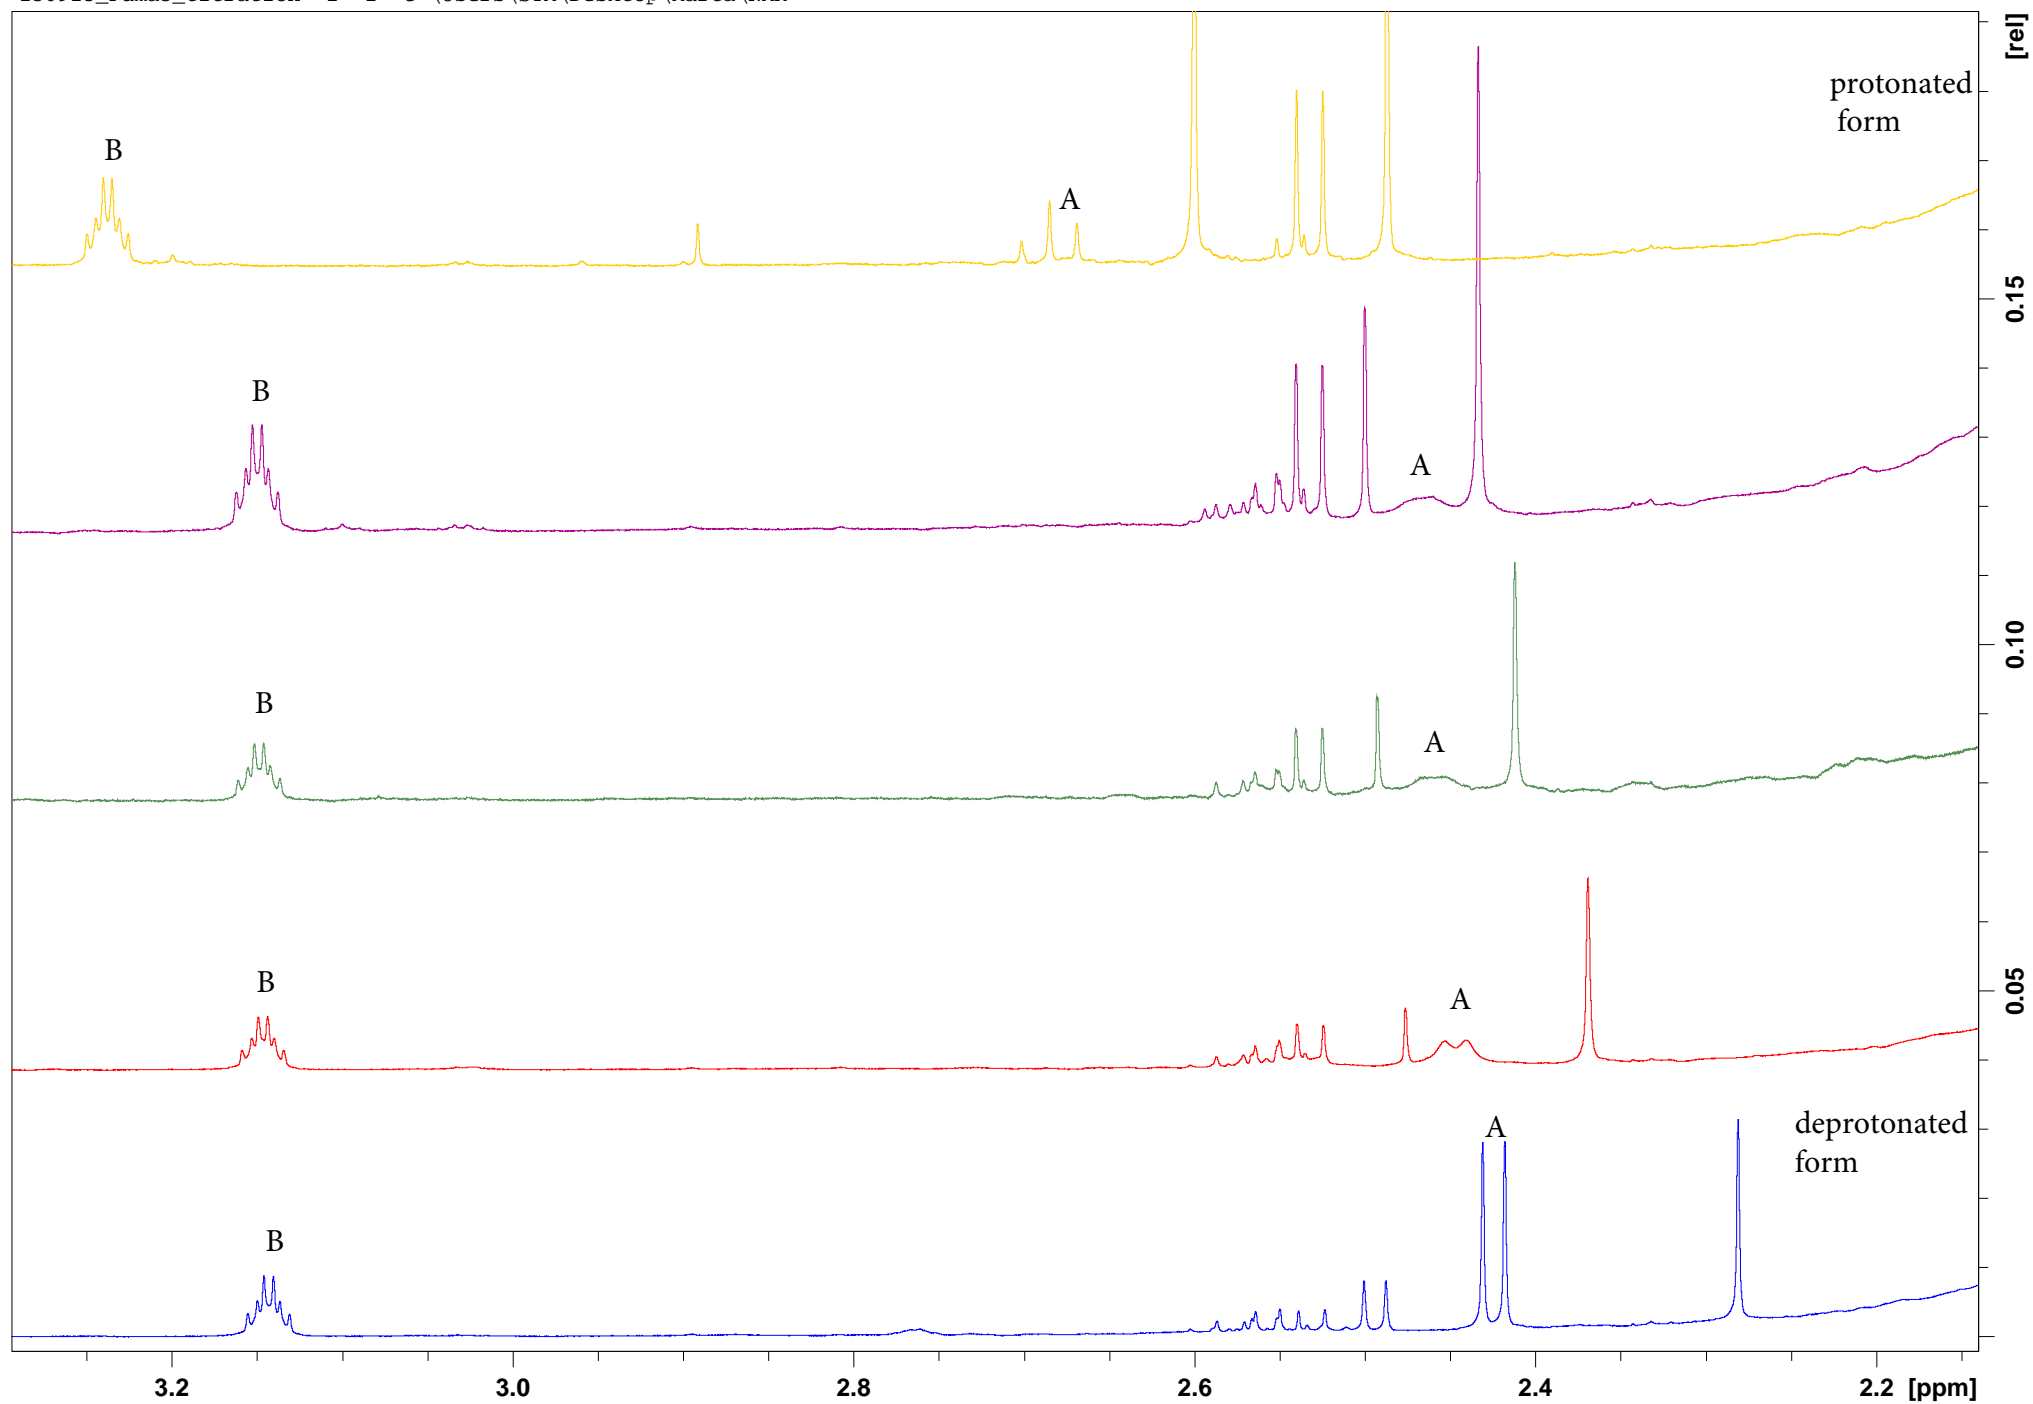

A: P(dma)<sub>3</sub>  
B: 2-Cl-C<sub>6</sub>H<sub>4</sub>-N=P<sub>1</sub>(dma)  
C: 4-(4-dma-C<sub>6</sub>H<sub>4</sub>-N=N)-C<sub>6</sub>H<sub>4</sub>P<sub>1</sub>(pyrr)<sub>2</sub>Ph

231215\_Pdma3\_titration 1 1 C:\Users\STM\Desktop\Marta\NMR

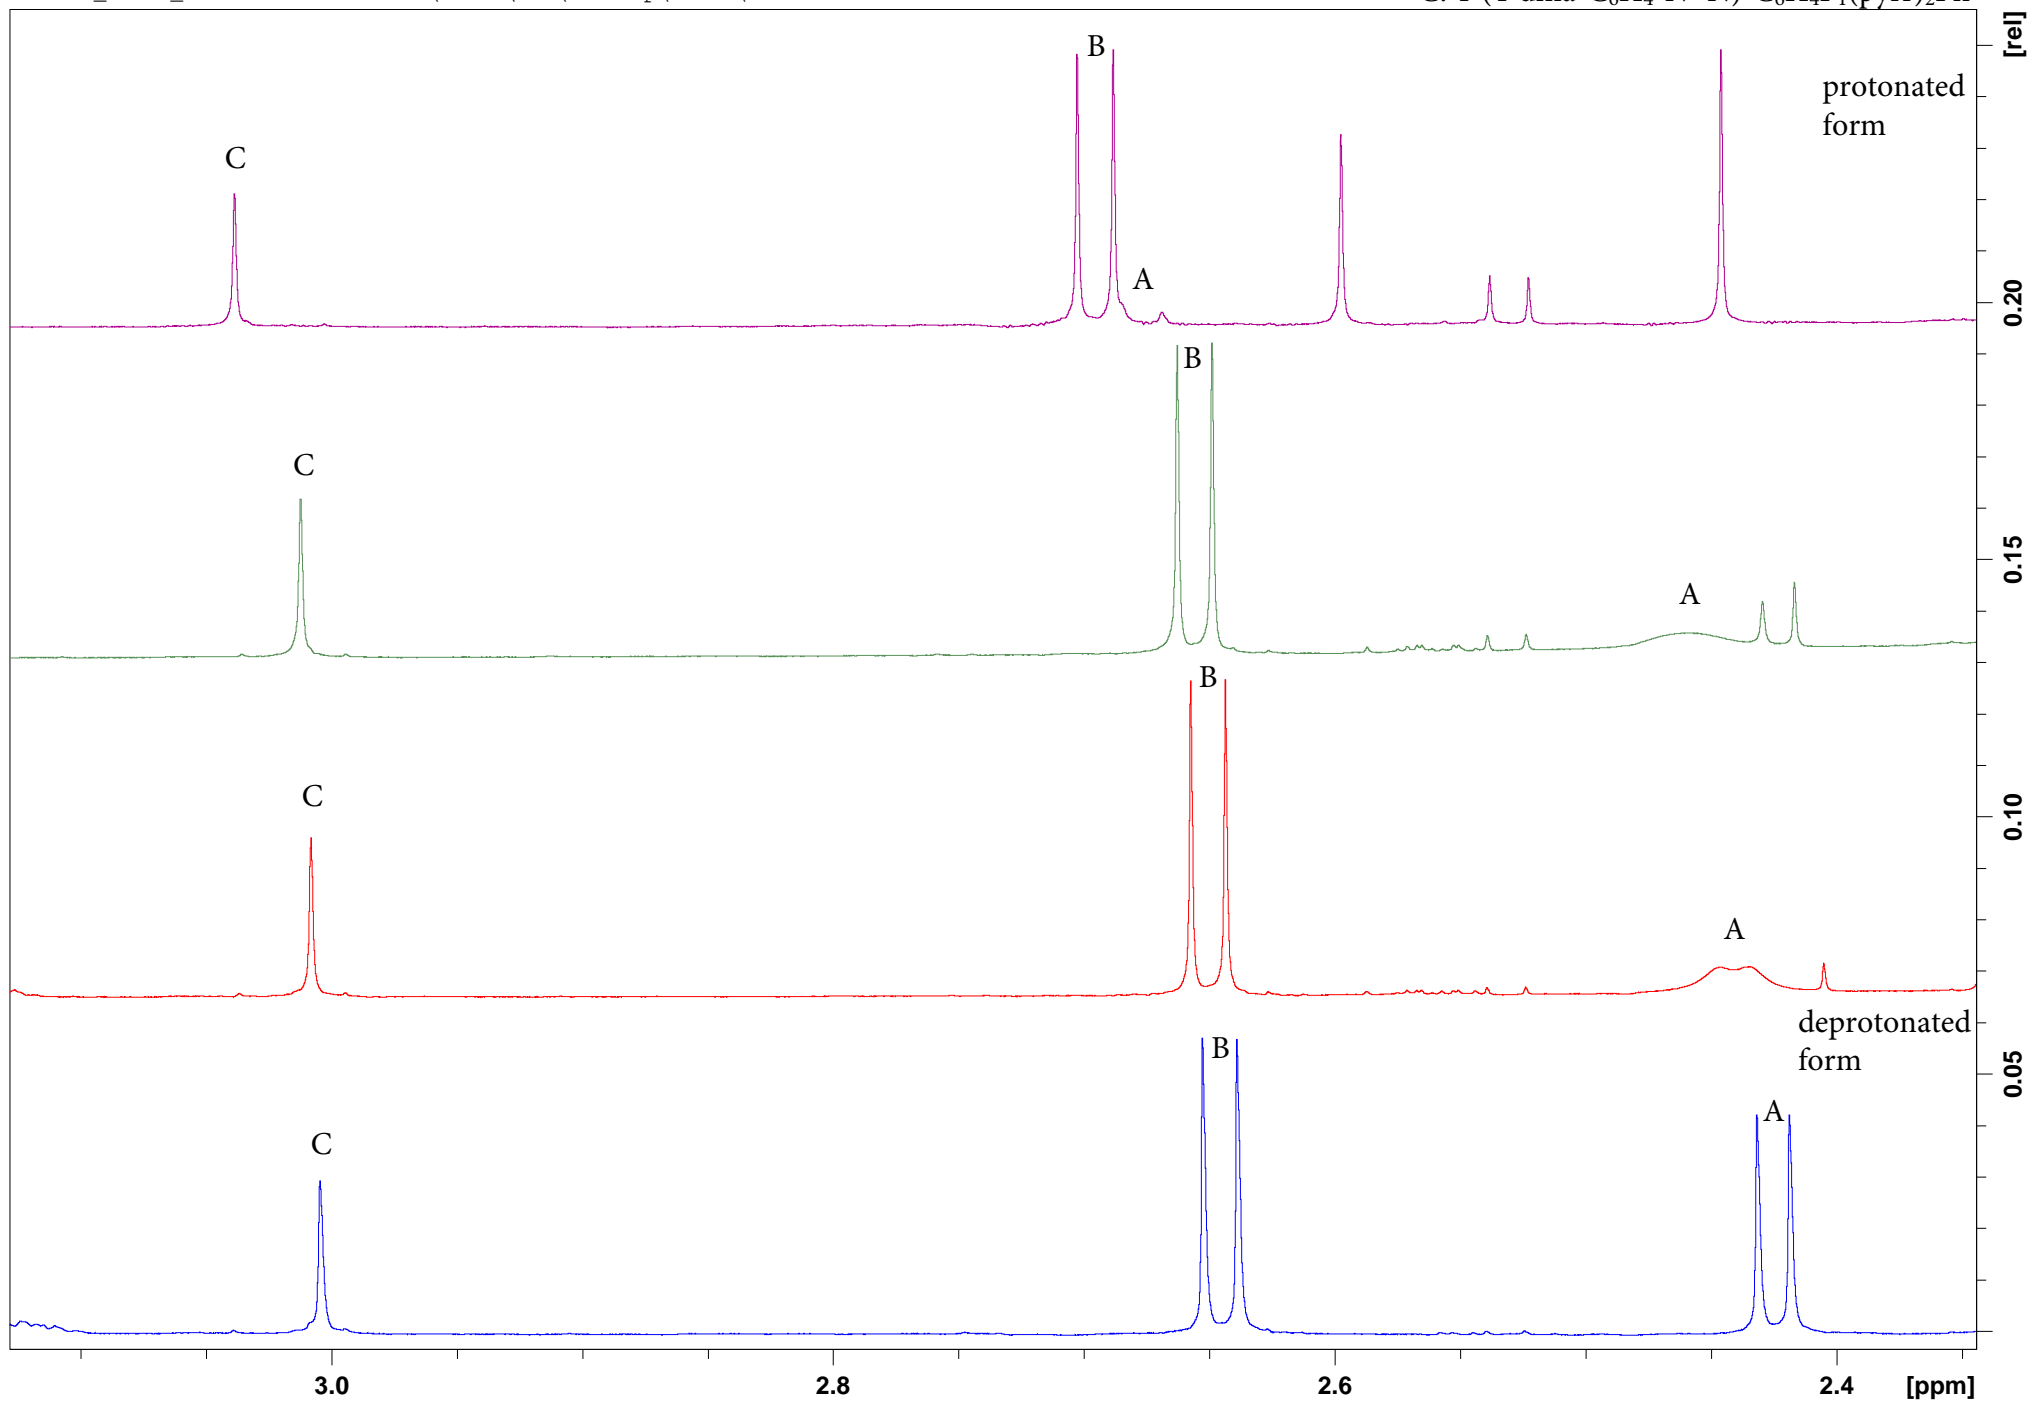

A: PCy<sub>3</sub>

B: 2-NO<sub>2</sub>-4-CF<sub>3</sub>-C<sub>6</sub>H<sub>3</sub>-N=P<sub>1</sub>(pyrr)<sub>3</sub>

240221\_PCy3\_titration 1 1 C:\Users\STM\Desktop\Marta\NMR

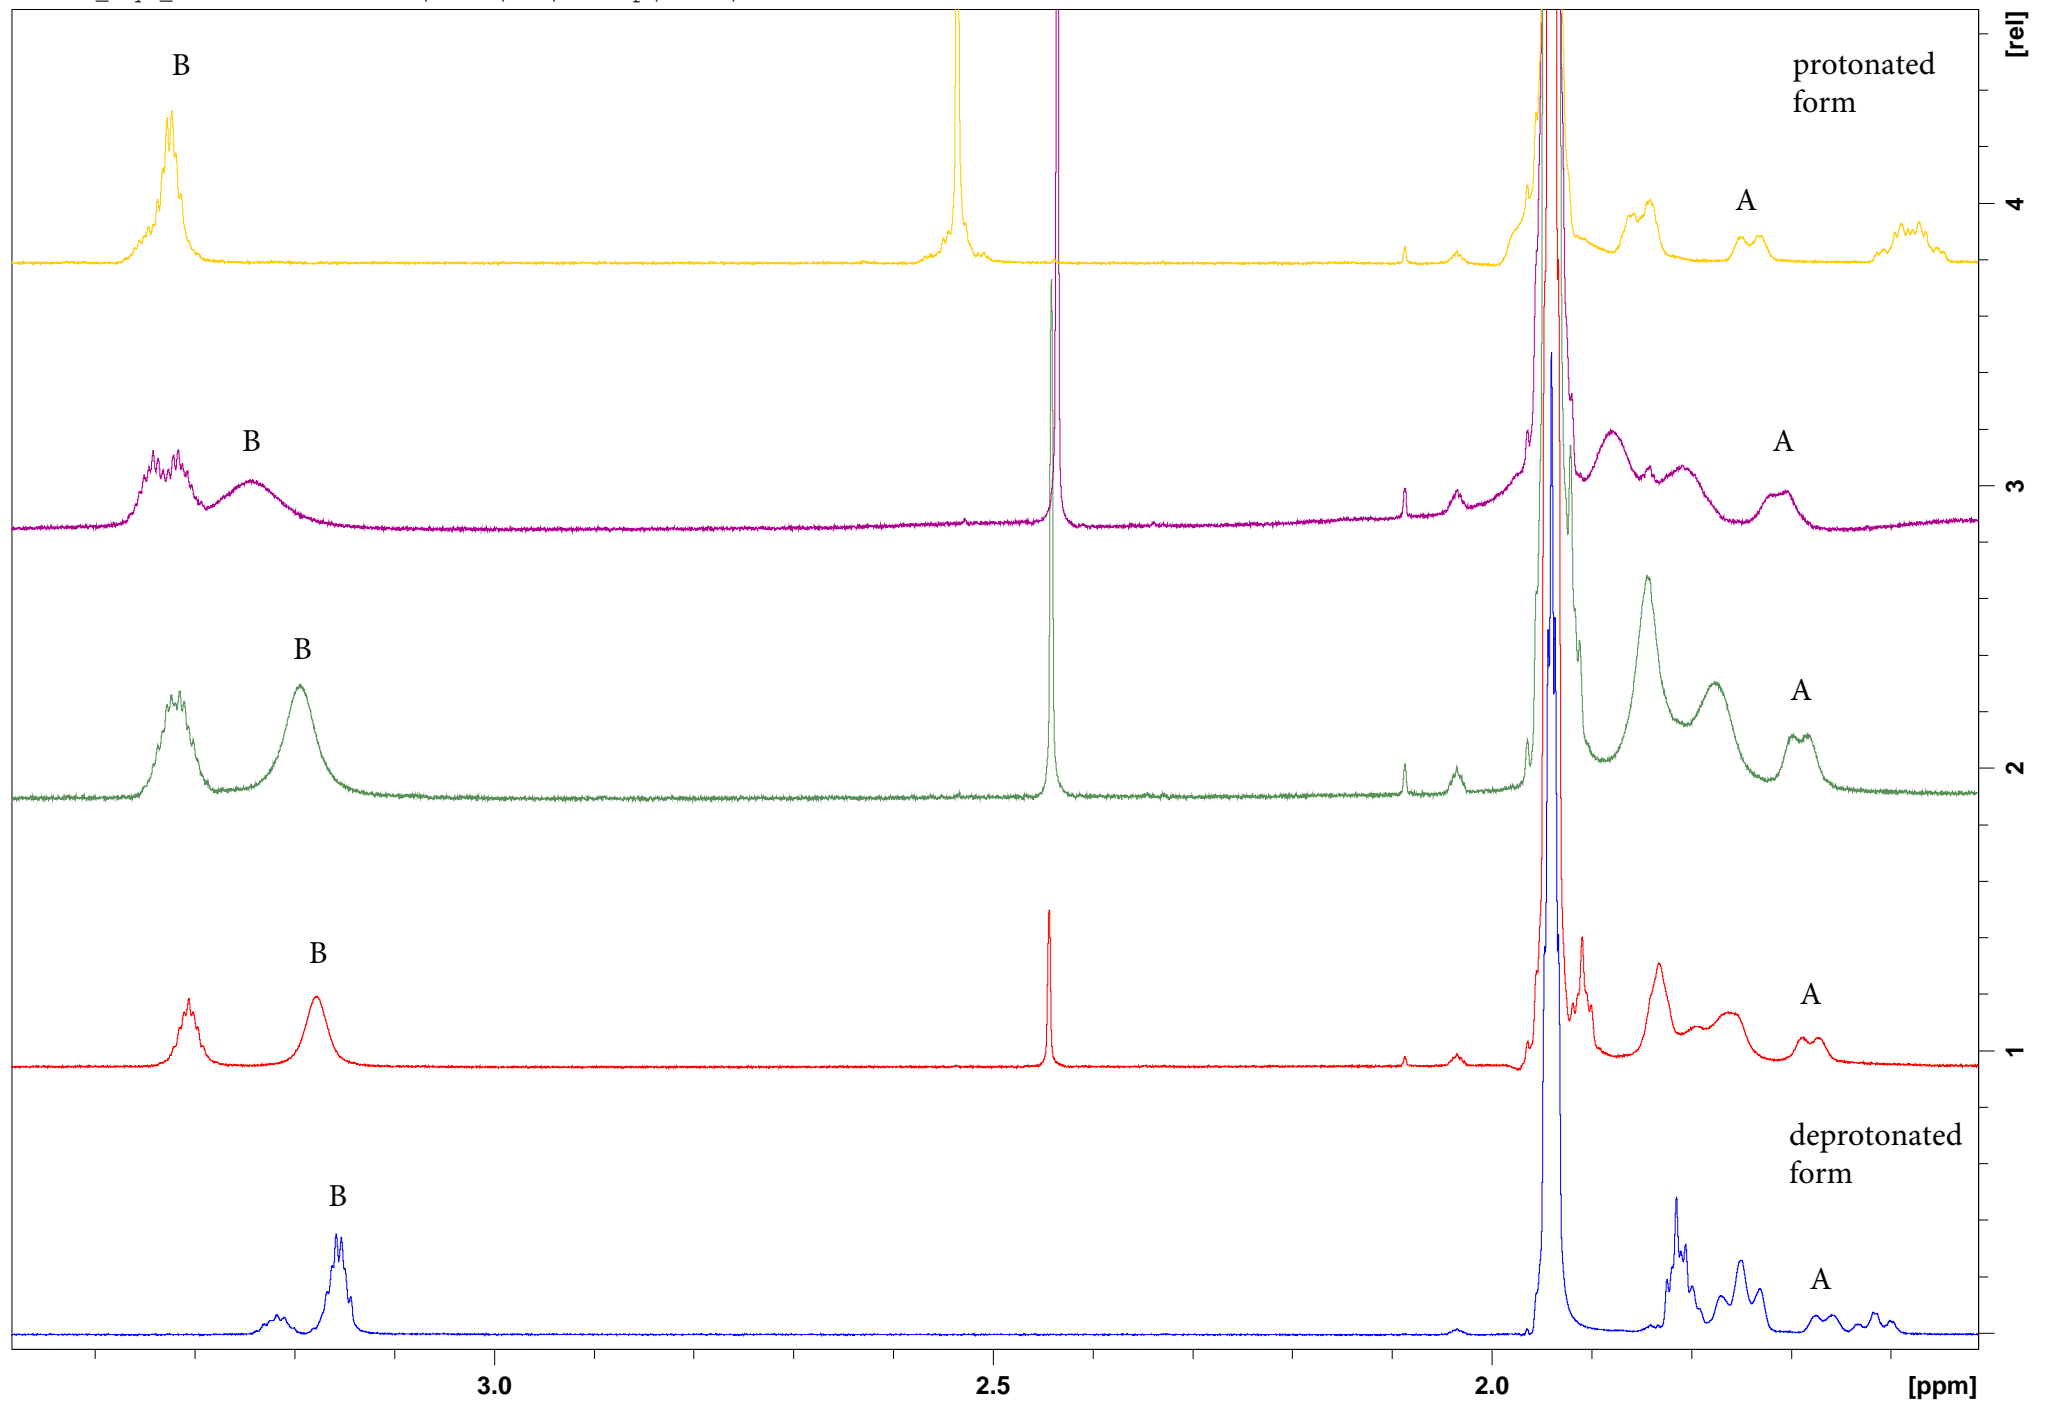



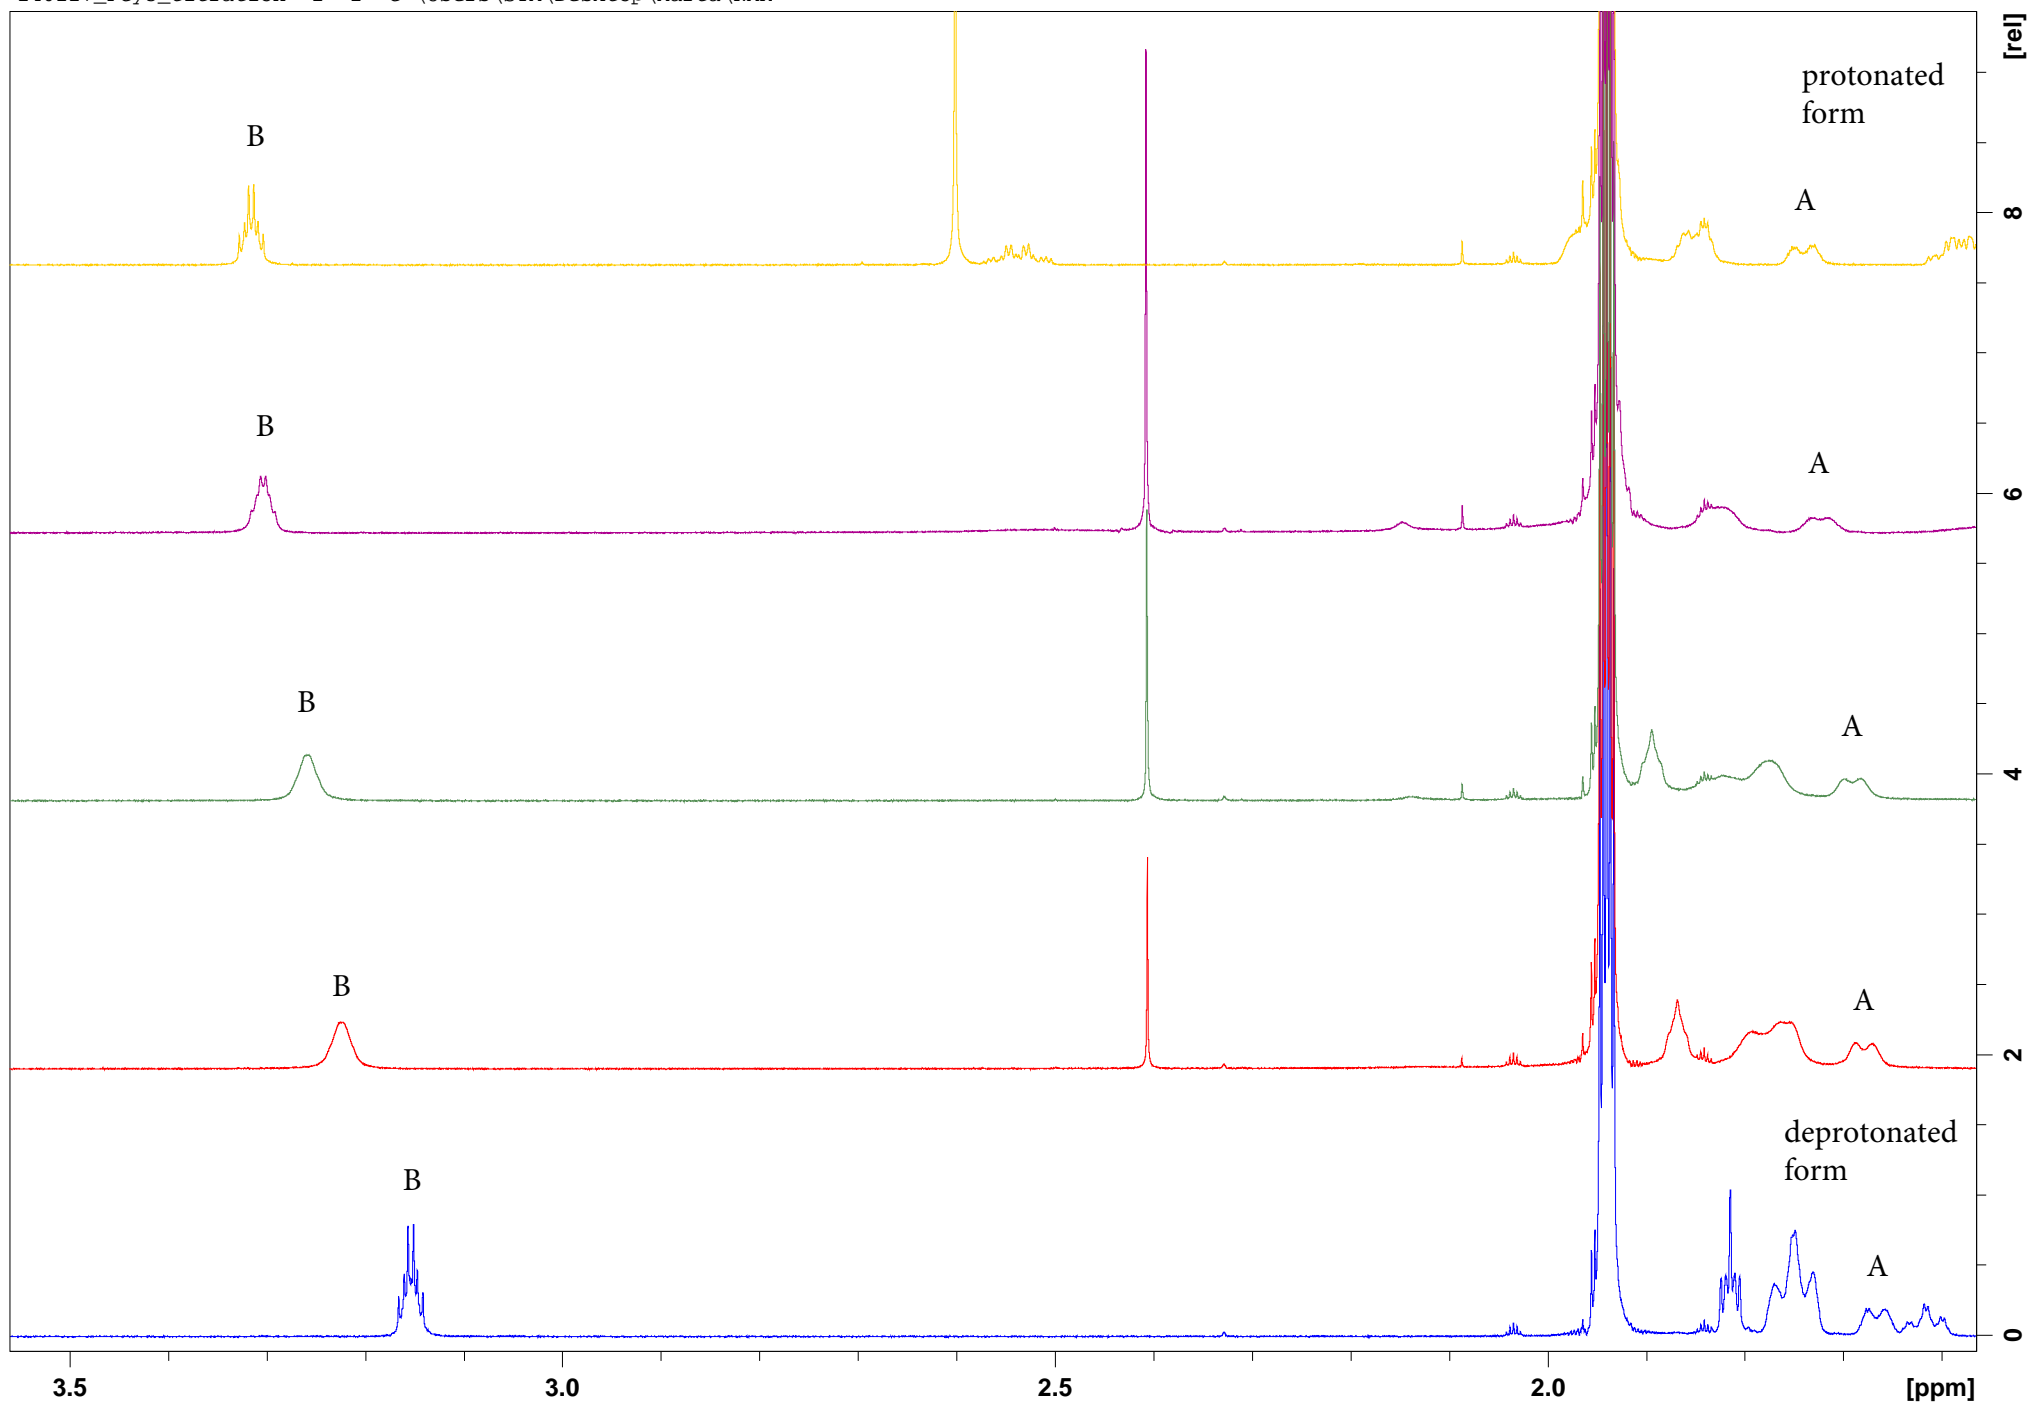

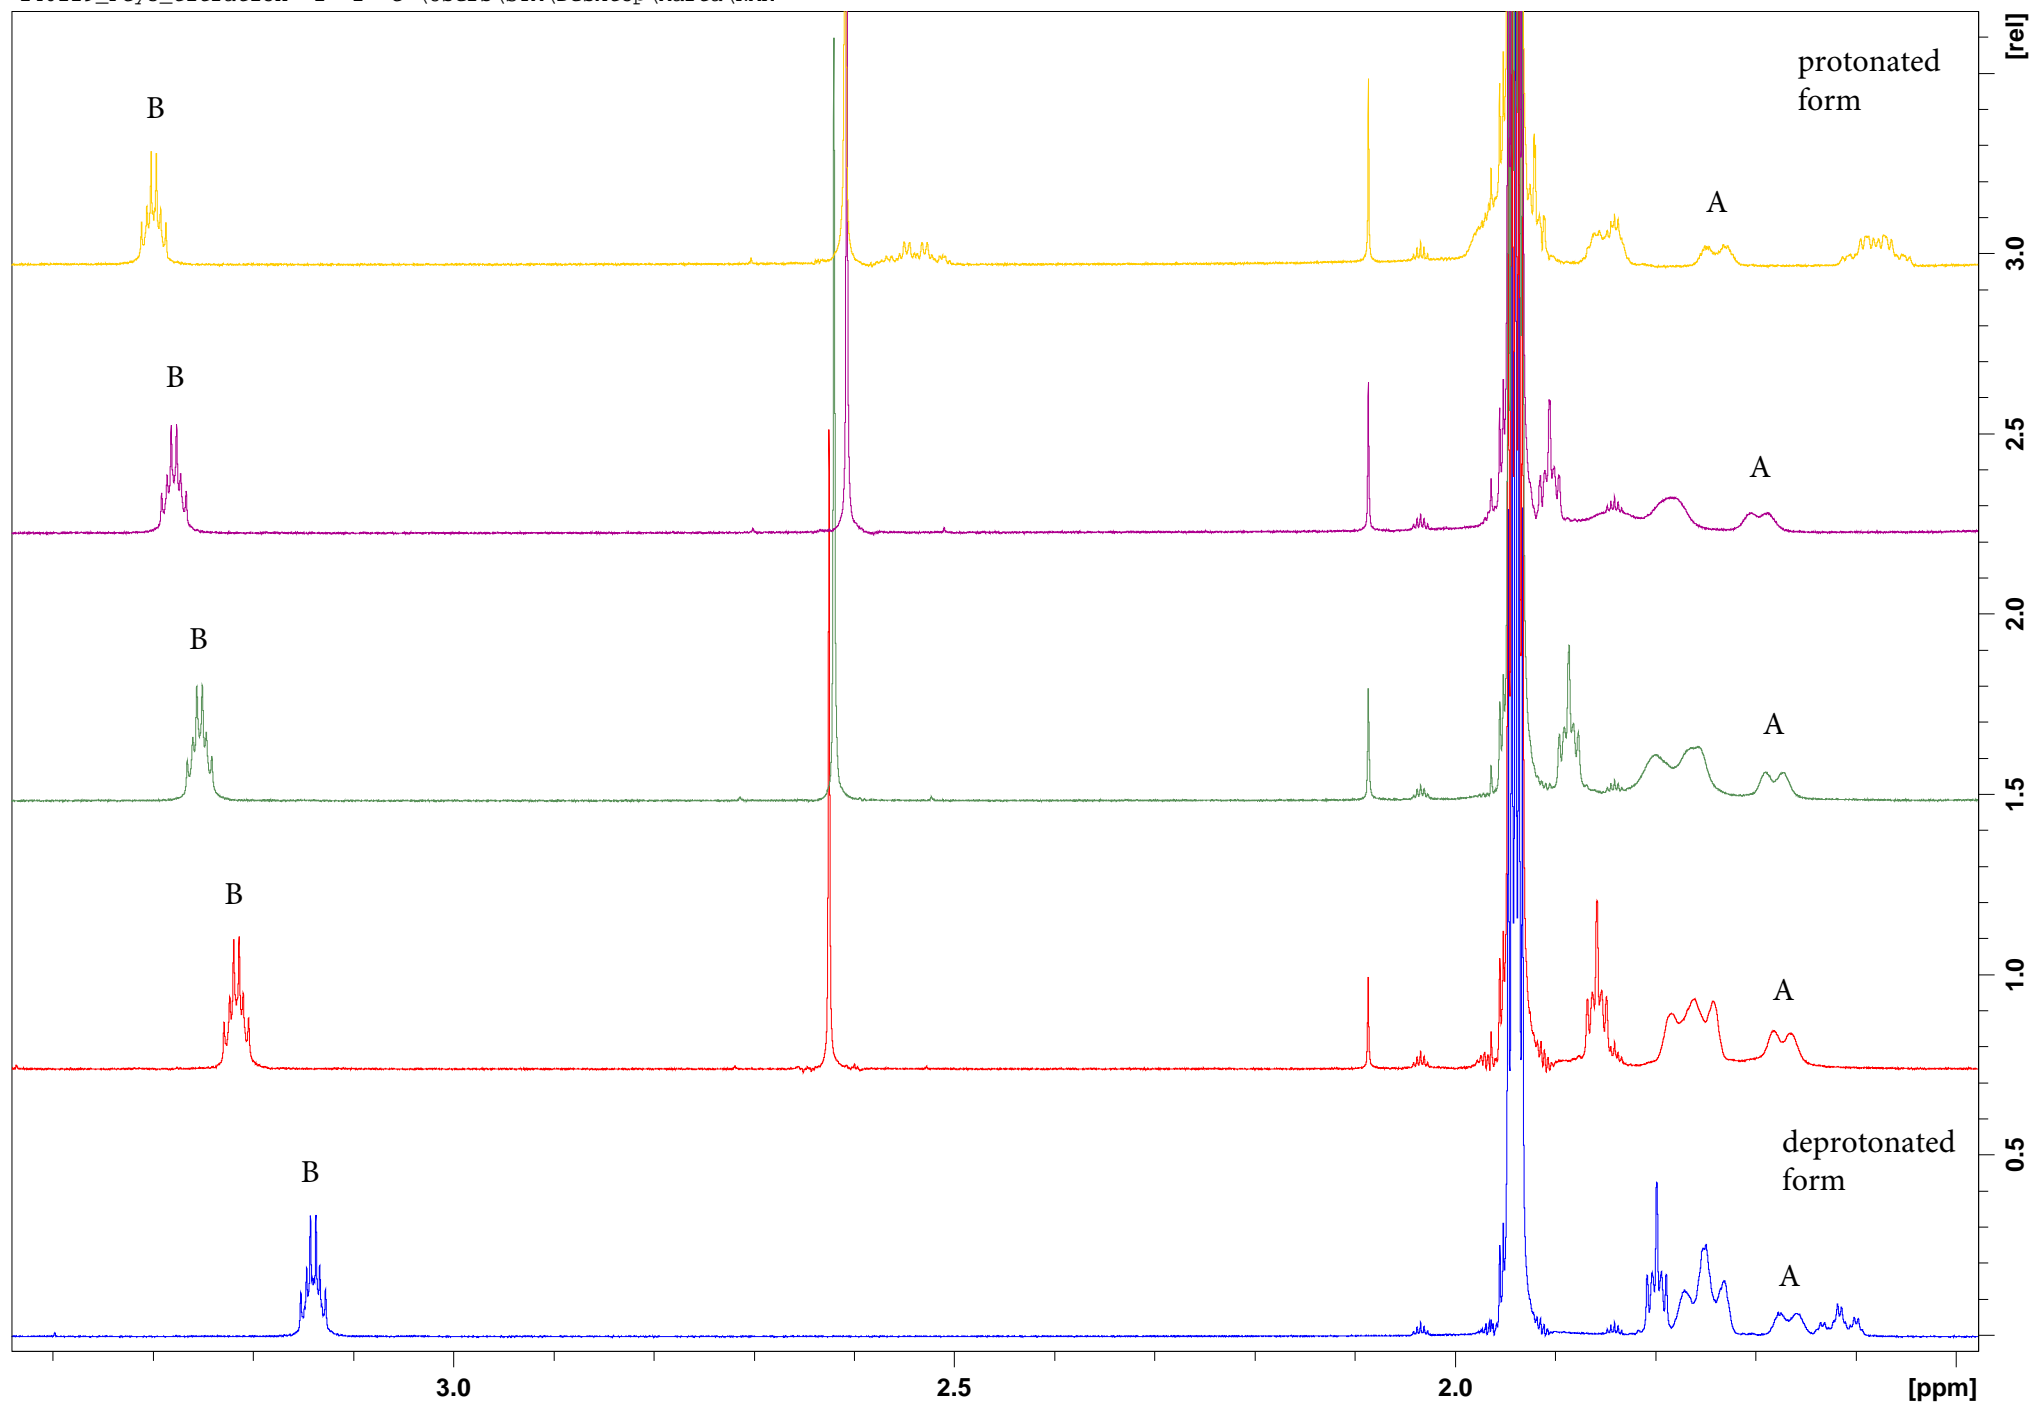

## Computational methods

### Proton Affinity (PA) and Gas-phase Basicity (GB) values in the gas phase

The geometries (.xyz files) for all the calculated species (both neutral and ionic forms) are available at DataDOI (<https://doi.org/10.23673/re-461>).<sup>74</sup>

| No | Compound                | Neutral/<br>Cation | SCF-Energy, AU | Enthalpy,<br>AU | PA,<br>kcal/mol | Chem. pot,<br>AU | GB,<br>kcal/mol |
|----|-------------------------|--------------------|----------------|-----------------|-----------------|------------------|-----------------|
| 1  | P(pyrr)3                | Neutral            | -977.64583     | 0.36708         | 250.4           | 0.29970          | 241.8           |
|    |                         | Cation             | -978.05552     | 0.38010         |                 | 0.31405          |                 |
| 2  | [2,4,6-(MeO)3-C6H2]3P   | Neutral            | -2067.79433    | 0.58771         | 270.8           | 0.46786          | 261.5           |
|    |                         | Cation             | -2068.23621    | 0.60047         |                 | 0.48301          |                 |
| 3  | P(dma)3                 | Neutral            | -745.29819     | 0.25675         | 241.2           | 0.20059          | 234.5           |
|    |                         | Cation             | -745.69342     | 0.26996         |                 | 0.21216          |                 |
| 4  | P(adamantyl)3           | Neutral            | -1512.15264    | 0.70624         | 253.3           | 0.62949          | 246.2           |
|    |                         | Cation             | -1512.56582    | 0.71810         |                 | 0.64026          |                 |
| 5  | P(t-Bu)3                | Neutral            | -815.09851     | 0.37662         | 245.0           | 0.31543          | 238.1           |
|    |                         | Cation             | -815.49807     | 0.38806         |                 | 0.32556          |                 |
| 6  | [2,6-(MeO)2-C6H3]3P     | Neutral            | -1724.06200    | 0.48564         | 262.8           | 0.38527          | 254.2           |
|    |                         | Cation             | -1724.49134    | 0.49847         |                 | 0.39944          |                 |
| 7  | PCy3                    | Neutral            | -1047.47797    | 0.48885         | 245.9           | 0.41920          | 240.3           |
|    |                         | Cation             | -1047.87868    | 0.50008         |                 | 0.42699          |                 |
| 8  | [2,4,6-(MeO)3-C6H2]2PhP | Neutral            | -1724.07205    | 0.48604         | 260.7           | 0.38549          | 252.6           |
|    |                         | Cation             | -1724.49745    | 0.49837         |                 | 0.39835          |                 |
| 9  | P(i-Pr)3                | Neutral            | -697.14408     | 0.29089         | 239.9           | 0.23468          | 233.1           |
|    |                         | Cation             | -697.53537     | 0.30220         |                 | 0.24456          |                 |
| 10 | PMe2Et                  | Neutral            | -500.52431     | 0.14617         | 230.8           | 0.10521          | 223.5           |
|    |                         | Cation             | -500.90085     | 0.15722         |                 | 0.11560          |                 |
| 11 | PMe3                    | Neutral            | -461.19924     | 0.11688         | 228.8           | 0.07994          | 221.4           |
|    |                         | Cation             | -461.57260     | 0.12797         |                 | 0.09055          |                 |
| 12 | P(i-Pr)2Me              | Neutral            | -618.49898     | 0.23277         | 236.2           | 0.18142          | 228.6           |
|    |                         | Cation             | -618.88426     | 0.24405         |                 | 0.19235          |                 |
| 13 | PMeEt2                  | Neutral            | -539.84923     | 0.17549         | 232.7           | 0.13095          | 225.4           |
|    |                         | Cation             | -540.22882     | 0.18657         |                 | 0.14131          |                 |
| 14 | P(n-Pr)3                | Neutral            | -697.15560     | 0.29145         | 237.0           | 0.23109          | 229.5           |
|    |                         | Cation             | -697.54240     | 0.30287         |                 | 0.24220          |                 |
| 15 | PEt3                    | Neutral            | -579.17393     | 0.20471         | 234.3           | 0.15628          | 226.8           |
|    |                         | Cation             | -579.55611     | 0.21592         |                 | 0.16702          |                 |
| 16 | P(n-Bu)3                | Neutral            | -815.13709     | 0.37825         | 238.4           | 0.30575          | 230.0           |
|    |                         | Cation             | -815.52617     | 0.38969         |                 | 0.31830          |                 |
| 17 | P(t-Bu)2Ph              | Neutral            | -888.94679     | 0.34465         | 243.0           | 0.28125          | 236.1           |
|    |                         | Cation             | -889.34315     | 0.35609         |                 | 0.29141          |                 |
| 18 | P(i-Bu)3                | Neutral            | -815.13674     | 0.37680         | 237.8           | 0.30769          | 229.7           |
|    |                         | Cation             | -815.52473     | 0.38812         |                 | 0.31962          |                 |
| 19 | PCy2Ph                  | Neutral            | -1043.86228    | 0.42023         | 242.3           | 0.35220          | 235.1           |
|    |                         | Cation             | -1044.25742    | 0.43166         |                 | 0.36260          |                 |
| 20 | P(Mes)3                 | Neutral            | -1390.56884    | 0.53758         | 248.7           | 0.43855          | 239.5           |
|    |                         | Cation             | -1390.97473    | 0.54948         |                 | 0.45284          |                 |
| 21 | P(Np)3                  | Neutral            | -933.11173     | 0.46157         | 238.1           | 0.38766          | 231.3           |
|    |                         | Cation             | -933.49981     | 0.47260         |                 | 0.39709          |                 |
| 22 | PEt2Ph                  | Neutral            | -731.65712     | 0.23068         | 235.4           | 0.17712          | 228.2           |
|    |                         | Cation             | -732.04087     | 0.24171         |                 | 0.18720          |                 |
| 23 | P(n-Bu)2Ph              | Neutral            | -888.96583     | 0.34662         | 237.9           | 0.27838          | 231.8           |
|    |                         | Cation             | -889.35360     | 0.35762         |                 | 0.28673          |                 |
| 24 | PMe2Ph                  | Neutral            | -653.00600     | 0.17210         | 232.0           | 0.12509          | 224.4           |
|    |                         | Cation             | -653.38444     | 0.18316         |                 | 0.13593          |                 |
| 25 | [2,4,6-(MeO)3-Ph]Ph2P   | Neutral            | -1380.34899    | 0.38420         | 248.9           | 0.30208          | 241.5           |

|    |                                                                         |                     |             |         |       |         |       |
|----|-------------------------------------------------------------------------|---------------------|-------------|---------|-------|---------|-------|
|    |                                                                         | Cation              | -1380.75526 | 0.39621 |       | 0.31343 |       |
| 26 | P(t-Bu)Ph <sub>2</sub>                                                  | Neutral             | -962.78456  | 0.31369 | 239.9 | 0.24934 | 232.6 |
|    |                                                                         | Cation              | -963.17558  | 0.32477 |       | 0.25962 |       |
| 27 | PCyPh <sub>2</sub>                                                      | Neutral             | -1040.24191 | 0.35113 | 238.6 | 0.28452 | 231.3 |
|    |                                                                         | Cation              | -1040.63113 | 0.36252 |       | 0.29512 |       |
| 28 | PEtPh <sub>2</sub>                                                      | Neutral             | -884.13856  | 0.25655 | 235.0 | 0.19733 | 227.3 |
|    |                                                                         | Cation              | -884.52188  | 0.26780 |       | 0.20849 |       |
| 29 | (4-MeO-C <sub>6</sub> H <sub>4</sub> ) <sub>3</sub> P                   | Neutral             | -1380.35739 | 0.38445 | 246.4 | 0.30032 | 239.5 |
|    |                                                                         | Cation              | -1380.75909 | 0.39584 |       | 0.31042 |       |
| 30 | PMePh <sub>2</sub>                                                      | Neutral             | -844.81368  | 0.22730 | 233.9 | 0.17148 | 226.5 |
|    |                                                                         | Cation              | -845.19523  | 0.23848 |       | 0.18201 |       |
| 31 | (2-MeO-C <sub>6</sub> H <sub>4</sub> ) <sub>3</sub> P                   | Neutral             | -1380.35295 | 0.38429 | 249.2 | 0.30282 | 241.4 |
|    |                                                                         | Cation              | -1380.75976 | 0.39625 |       | 0.31490 |       |
| 32 | P(Bn) <sub>3</sub>                                                      | Neutral             | -1154.61220 | 0.36807 | 236.6 | 0.29265 | 229.1 |
|    |                                                                         | Cation              | -1154.99808 | 0.37927 |       | 0.30342 |       |
| 33 | (4-Me-C <sub>6</sub> H <sub>4</sub> ) <sub>3</sub> P                    | Neutral             | -1154.61556 | 0.36768 | 241.5 | 0.28833 | 234.8 |
|    |                                                                         | Cation              | -1155.00905 | 0.37872 |       | 0.29771 |       |
| 34 | (2-Me-C <sub>6</sub> H <sub>4</sub> ) <sub>3</sub> P                    | Neutral             | -1154.61170 | 0.36756 | 238.3 | 0.29380 | 230.7 |
|    |                                                                         | Cation              | -1155.00046 | 0.37899 |       | 0.30489 |       |
| 35 | PPh <sub>3</sub>                                                        | Neutral             | -1036.62153 | 0.28251 | 235.7 | 0.21777 | 228.6 |
|    |                                                                         | Cation              | -1037.00600 | 0.29369 |       | 0.22801 |       |
| 36 | 1-NaphtPh <sub>2</sub> P                                                | Neutral             | -1190.32184 | 0.33061 | 237.5 | 0.26049 | 230.0 |
|    |                                                                         | Cation              | -1190.70922 | 0.34183 |       | 0.27141 |       |
| 37 | (3-MeO-C <sub>6</sub> H <sub>4</sub> ) <sub>3</sub> P                   | Neutral             | -1380.35698 | 0.38426 | 241.2 | 0.30099 | 234.6 |
|    |                                                                         | Cation              | -1380.75028 | 0.39549 |       | 0.31037 |       |
| 38 | [3,5-(MeO) <sub>2</sub> -C <sub>6</sub> H <sub>3</sub> ] <sub>3</sub> P | Neutral             | -1724.09080 | 0.48615 | 245.7 | 0.38300 | 237.9 |
|    |                                                                         | Cation              | -1724.49103 | 0.49723 |       | 0.39410 |       |
| 39 | (4-F-C <sub>6</sub> H <sub>4</sub> ) <sub>3</sub> P                     | Neutral             | -1334.49046 | 0.26108 | 230.6 | 0.19066 | 224.0 |
|    |                                                                         | Cation              | -1334.86660 | 0.27202 |       | 0.19979 |       |
| 40 | (1-Napht) <sub>3</sub> P                                                | Neutral             | -1497.72251 | 0.43467 | 232.3 | 0.34001 | 254.8 |
|    |                                                                         | Cation              | -1498.11473 | 0.42326 |       | 0.35210 |       |
| 41 | (2-F-C <sub>6</sub> H <sub>4</sub> )Ph <sub>2</sub> P                   | Neutral             | -1135.91074 | 0.27541 | 234.3 | 0.20940 | 227.5 |
|    |                                                                         | Cation              | -1136.29281 | 0.28649 |       | 0.21894 |       |
| 42 | (2,6-F <sub>2</sub> -C <sub>6</sub> H <sub>3</sub> )Ph <sub>2</sub> P   | Neutral             | -1235.19462 | 0.26819 | 234.0 | 0.19999 | 226.3 |
|    |                                                                         | Cation              | -1235.57667 | 0.27962 |       | 0.21146 |       |
| 43 | (4-Cl-C <sub>6</sub> H <sub>4</sub> ) <sub>3</sub> P                    | Neutral             | -2415.62482 | 0.25829 | 229.7 | 0.18344 | 223.3 |
|    |                                                                         | Cation              | -2415.99918 | 0.26892 |       | 0.19194 |       |
| 44 | PPh <sub>2</sub> H                                                      | Neutral             | -805.47926  | 0.19758 | 224.6 | 0.14469 | 216.7 |
|    |                                                                         | Cation              | -805.84585  | 0.20866 |       | 0.15592 |       |
| 45 | (2-F-C <sub>6</sub> H <sub>4</sub> ) <sub>2</sub> PhP                   | Neutral             | -1235.19969 | 0.26830 | 232.8 | 0.20037 | 225.3 |
|    |                                                                         | Cation              | -1235.57953 | 0.27945 |       | 0.21116 |       |
| 46 | (2-F-C <sub>6</sub> H <sub>4</sub> ) <sub>3</sub> P                     | Neutral             | -1334.48825 | 0.26112 | 231.5 | 0.19163 | 224.1 |
|    |                                                                         | Cation              | -1334.86606 | 0.27235 |       | 0.20225 |       |
| 47 | (C <sub>6</sub> F <sub>5</sub> )Ph <sub>2</sub> P                       | Neutral             | -1533.03064 | 0.24737 | 227.4 | 0.17286 | 219.9 |
|    |                                                                         | Cation              | -1533.40197 | 0.25863 |       | 0.18378 |       |
| 48 | (2,6-F <sub>2</sub> -C <sub>6</sub> H <sub>3</sub> ) <sub>2</sub> PhP   | Neutral             | -1433.76794 | 0.25385 | 231.5 | 0.18287 | 224.9 |
|    |                                                                         | Cation              | -1434.14575 | 0.26516 |       | 0.19231 |       |
| 49 | (2,6-Cl <sub>2</sub> -C <sub>6</sub> H <sub>3</sub> ) <sub>3</sub> P    | Neutral             | -3794.58897 | 0.23304 | 233.6 | 0.15186 | 225.5 |
|    |                                                                         | Cation              | -3794.96994 | 0.24417 |       | 0.16343 |       |
| 50 | (2,6-F <sub>2</sub> -C <sub>6</sub> H <sub>3</sub> ) <sub>3</sub> P     | Neutral             | -1632.34173 | 0.23955 | 229.1 | 0.16478 | 222.0 |
|    |                                                                         | Cation              | -1632.71590 | 0.25094 |       | 0.17511 |       |
| 51 | P[CH <sub>2</sub> CH(CF <sub>3</sub> ) <sub>2</sub> ] <sub>3</sub>      | Neutral             | -2602.42079 | 0.25348 | 209.5 | 0.15325 | 201.9 |
|    |                                                                         | Cation              | -2602.76305 | 0.26424 |       | 0.16382 |       |
| 52 | PPh <sub>2</sub> Cl                                                     | Neutral             | -1265.17634 | 0.19182 | 221.1 | 0.13516 | 212.5 |
|    |                                                                         | Cation              | -1265.53726 | 0.20283 |       | 0.14738 |       |
| 53 | P(C <sub>6</sub> F <sub>5</sub> ) <sub>2</sub> Ph                       | Neutral             | -2029.43871 | 0.21208 | 218.4 | 0.12743 | 211.1 |
|    |                                                                         | Cation              | -2029.79556 | 0.22329 |       | 0.13789 |       |
| 54 | P[3,5-(CF <sub>3</sub> ) <sub>2</sub> Ph] <sub>3</sub>                  | Neutral             | -3059.89105 | 0.32980 | 210.1 | 0.20752 | 200.5 |
|    |                                                                         | Cation <sup>a</sup> | -3060.23299 | 0.33928 |       | 0.21993 |       |
| 55 | P(CH <sub>2</sub> CF <sub>3</sub> ) <sub>3</sub>                        | Neutral             | -1472.83350 | 0.14269 | 202.0 | 0.07782 | 194.6 |
|    |                                                                         | Cation              | -1473.16349 | 0.15318 |       | 0.08763 |       |
| 56 | P(C <sub>6</sub> F <sub>5</sub> ) <sub>3</sub>                          | Neutral             | -2525.84636 | 0.17688 | 209.6 | 0.08164 | 201.8 |
|    |                                                                         | Cation              | -2526.18925 | 0.18816 |       | 0.09294 |       |

<sup>a</sup> imaginary frequency of  $-5\text{ cm}^{-1}$  remained

## HOMO-LUMO energies

| No | Compound                | gas phase (BP86/def2-TZVP) |         |         |         | gas phase SP (MP2/def2-TZVPP) |        |         |         | cosmo (BP86/def-TZVP) |         |         |         |
|----|-------------------------|----------------------------|---------|---------|---------|-------------------------------|--------|---------|---------|-----------------------|---------|---------|---------|
|    |                         | HOMO                       | LUMO    | HOMO    | LUMO    | HOMO                          | LUMO   | HOMO    | LUMO    | HOMO                  | LUMO    | HOMO    | LUMO    |
|    |                         | neutral                    |         | cation  |         | neutral                       |        | cation  |         | neutral               |         | cation  |         |
| 1  | P(pyrr)3                | -0.1662                    | 0.0017  | -0.3378 | -0.1384 | -0.3100                       | 0.1274 | -0.5024 | -0.0015 | -0.1686               | -0.0026 | -0.2094 | -0.0175 |
| 2  | [2,4,6-(MeO)3-C6H2]3P   | -0.1429                    | -0.0256 | -0.2858 | -0.1477 | -0.2443                       | 0.1301 | -0.4007 | 0.0189  | -0.1633               | -0.0394 | -0.2046 | -0.0646 |
| 3  | P(dma)3                 | -0.1701                    | 0.0056  | -0.3573 | -0.1523 | -0.3143                       | 0.1262 | -0.5208 | -0.0118 | -0.1729               | -0.0008 | -0.2160 | -0.0128 |
| 4  | P(adamantyl)3           | -0.1734                    | -0.0093 | -0.3496 | -0.1624 | -0.2970                       | 0.1138 | -0.4965 | 0.0003  | -0.1796               | -0.0047 | -0.2438 | -0.0492 |
| 5  | P(t-Bu)3                | -0.1804                    | 0.0088  | -0.4177 | -0.1798 | -0.3058                       | 0.1332 | -0.5673 | -0.0116 | -0.1845               | 0.0131  | -0.2875 | -0.0459 |
| 6  | [2,6-(MeO)2-C6H3]3P     | -0.1551                    | -0.0414 | -0.3014 | -0.1703 | -0.2553                       | 0.1217 | -0.4129 | -0.0059 | -0.1723               | -0.0507 | -0.2093 | -0.0772 |
| 7  | PCy3                    | -0.1824                    | 0.0059  | -0.3820 | -0.1554 | -0.3103                       | 0.1279 | -0.5369 | 0.0009  | -0.1904               | 0.0034  | -0.2660 | -0.0247 |
| 8  | [2,4,6-(MeO)3-C6H2]2PhP | -0.1568                    | -0.0375 | -0.3003 | -0.1702 | -0.2596                       | 0.1275 | -0.4178 | -0.0054 | -0.1748               | -0.0523 | -0.2102 | -0.0795 |
| 9  | P(i-Pr)3                | -0.1864                    | 0.0038  | -0.4317 | -0.1708 | -0.3149                       | 0.1336 | -0.5899 | -0.0138 | -0.1916               | 0.0063  | -0.2937 | -0.0248 |
| 10 | PMe2Et                  | -0.1950                    | 0.0093  | -0.4766 | -0.1794 | -0.3274                       | 0.1362 | -0.6438 | -0.0351 | -0.1999               | 0.0110  | -0.3166 | -0.0067 |
| 11 | PMe3                    | -0.1961                    | 0.0166  | -0.5214 | -0.1850 | -0.3294                       | 0.1346 | -0.6886 | -0.0424 | -0.2006               | 0.0181  | -0.3460 | -0.0054 |
| 12 | P(i-Pr)2Me              | -0.1905                    | 0.0064  | -0.4434 | -0.1711 | -0.3207                       | 0.1322 | -0.6009 | -0.0216 | -0.1959               | 0.0087  | -0.2985 | -0.0156 |
| 13 | PMeEt2                  | -0.1941                    | 0.0079  | -0.4649 | -0.1744 | -0.3255                       | 0.1359 | -0.6288 | -0.0286 | -0.1993               | 0.0086  | -0.3096 | -0.0123 |
| 14 | P(n-Pr)3                | -0.1928                    | 0.0076  | -0.4337 | -0.1612 | -0.3232                       | 0.1374 | -0.6002 | -0.0126 | -0.1987               | 0.0083  | -0.2997 | -0.0130 |
| 15 | PEt3                    | -0.1934                    | 0.0072  | -0.4598 | -0.1738 | -0.3239                       | 0.1416 | -0.6238 | -0.0262 | -0.1988               | 0.0081  | -0.3093 | -0.0131 |
| 16 | P(n-Bu)3                | -0.1922                    | 0.0097  | -0.4073 | -0.1613 | -0.3225                       | 0.1365 | -0.5715 | -0.0133 | -0.1986               | 0.0099  | -0.2881 | -0.0125 |
| 17 | P(t-Bu)2Ph              | -0.1879                    | -0.0595 | -0.3733 | -0.2067 | -0.3153                       | 0.1058 | -0.4732 | -0.0411 | -0.1936               | -0.0591 | -0.2544 | -0.0846 |
| 18 | P(i-Bu)3                | -0.1912                    | 0.0032  | -0.4211 | -0.1538 | -0.3199                       | 0.1342 | -0.5860 | -0.0100 | -0.1912               | 0.0078  | -0.2927 | -0.0226 |
| 19 | PCy2Ph                  | -0.1904                    | -0.0567 | -0.3705 | -0.2047 | -0.3129                       | 0.1067 | -0.4713 | -0.0406 | -0.1977               | -0.0577 | -0.2548 | -0.0856 |
| 20 | PMes3                   | -0.1693                    | -0.0581 | -0.3338 | -0.1863 | -0.2631                       | 0.1022 | -0.4348 | -0.0247 | -0.1751               | -0.0593 | -0.2357 | -0.0857 |
| 21 | P(Np)3                  | -0.1898                    | 0.0022  | -0.4106 | -0.1576 | -0.3165                       | 0.1256 | -0.5703 | -0.0019 | -0.1888               | 0.0071  | -0.2904 | -0.0254 |
| 22 | PEt2Ph                  | -0.1985                    | -0.0604 | -0.3822 | -0.2190 | -0.3322                       | 0.1038 | -0.4815 | -0.0537 | -0.2049               | -0.0598 | -0.2551 | -0.0861 |
| 23 | P(n-Bu)2Ph              | -0.1978                    | -0.0598 | -0.3770 | -0.2125 | -0.3315                       | 0.1048 | -0.4772 | -0.0476 | -0.2048               | -0.0596 | -0.2550 | -0.0859 |
| 24 | PMe2Ph                  | -0.1951                    | -0.0534 | -0.3867 | -0.2242 | -0.3084                       | 0.1090 | -0.4856 | -0.0587 | -0.1997               | -0.0547 | -0.2544 | -0.0839 |
| 25 | [2,4,6-(MeO)3-Ph]Ph2P   | -0.1751                    | -0.0506 | -0.3165 | -0.1935 | -0.2777                       | 0.1116 | -0.4358 | -0.0308 | -0.1904               | -0.0599 | -0.2167 | -0.0910 |
| 26 | P(t-Bu)Ph2              | -0.1920                    | -0.0664 | -0.3700 | -0.2142 | -0.3061                       | 0.0956 | -0.4694 | -0.0526 | -0.2001               | -0.0670 | -0.2546 | -0.0956 |
| 27 | PCyPh2                  | -0.1960                    | -0.0632 | -0.3677 | -0.2098 | -0.3084                       | 0.0993 | -0.4675 | -0.0477 | -0.2054               | -0.0660 | -0.2533 | -0.0914 |

|    |                     |         |         |         |         |         |        |         |         |         |         |         |         |
|----|---------------------|---------|---------|---------|---------|---------|--------|---------|---------|---------|---------|---------|---------|
| 28 | PEtPh2              | -0.1958 | -0.0626 | -0.3738 | -0.2182 | -0.3058 | 0.1000 | -0.4723 | -0.0566 | -0.2019 | -0.0628 | -0.2537 | -0.0898 |
| 29 | (4-MeO-C6H4)3P      | -0.1762 | -0.0535 | -0.3189 | -0.1854 | -0.2802 | 0.1038 | -0.4308 | -0.0308 | -0.1886 | -0.0605 | -0.2199 | -0.0838 |
| 30 | PMePh2              | -0.1958 | -0.0617 | -0.3752 | -0.2191 | -0.3039 | 0.1016 | -0.4735 | -0.0567 | -0.2032 | -0.0629 | -0.2536 | -0.0888 |
| 31 | (2-MeO-C6H4)3P      | -0.1750 | -0.0515 | -0.3229 | -0.1866 | -0.2772 | 0.1111 | -0.4322 | -0.0227 | -0.1919 | -0.0616 | -0.2224 | -0.0850 |
| 32 | P(Bn)3              | -0.2039 | -0.0520 | -0.3430 | -0.1824 | -0.3146 | 0.1124 | -0.4417 | -0.0155 | -0.2088 | -0.0549 | -0.2378 | -0.0740 |
| 33 | (4-Me-C6H4)3P       | -0.1864 | -0.0572 | -0.3472 | -0.1974 | -0.2875 | 0.1048 | -0.4473 | -0.0384 | -0.1974 | -0.0620 | -0.2418 | -0.0888 |
| 34 | (2-Me-C6H4)3P       | -0.1893 | -0.0619 | -0.3537 | -0.2018 | -0.2916 | 0.1002 | -0.4528 | -0.0391 | -0.1952 | -0.0630 | -0.2460 | -0.0922 |
| 35 | Ph3P                | -0.1944 | -0.0639 | -0.3675 | -0.2099 | -0.2982 | 0.0990 | -0.4662 | -0.0498 | -0.2034 | -0.0663 | -0.2545 | -0.0916 |
| 36 | 1-NaphtPh2P         | -0.1910 | -0.0830 | -0.3283 | -0.2153 | -0.2828 | 0.0735 | -0.4135 | -0.0598 | -0.1994 | -0.0873 | -0.2256 | -0.1082 |
| 37 | (3-MeO-C6H4)3P      | -0.1883 | -0.0624 | -0.3160 | -0.1945 | -0.2943 | 0.0956 | -0.4264 | -0.0389 | -0.1999 | -0.0663 | -0.2202 | -0.0907 |
| 38 | [3,5-(MeO)2-C6H3]3P | -0.1831 | -0.0511 | -0.2956 | -0.1774 | -0.2955 | 0.1053 | -0.4078 | -0.0243 | -0.1990 | -0.0628 | -0.2136 | -0.0885 |
| 39 | (4-F-C6H4)3P        | -0.2021 | -0.0739 | -0.3652 | -0.2165 | -0.3111 | 0.0827 | -0.4766 | -0.0610 | -0.2051 | -0.0699 | -0.2509 | -0.0941 |
| 40 | (1-Napht)3P         | -0.2950 | -0.0821 | -0.5337 | -0.2833 | -0.4648 | 0.0859 | -0.7467 | -0.1052 | -0.2923 | -0.0804 | -0.3868 | -0.1287 |
| 41 | (2-F-C6H4)Ph2P      | -0.1973 | -0.0676 | -0.3633 | -0.2118 | -0.3024 | 0.0943 | -0.4671 | -0.0499 | -0.2067 | -0.0695 | -0.2518 | -0.0958 |
| 42 | (2,6-F2-C6H3)Ph2P   | -0.1964 | -0.0769 | -0.3642 | -0.2226 | -0.3012 | 0.0845 | -0.4663 | -0.0625 | -0.2054 | -0.0772 | -0.2529 | -0.1069 |
| 43 | (4-Cl-C6H4)3P       | -0.2055 | -0.0792 | -0.3532 | -0.2176 | -0.3112 | 0.0803 | -0.4634 | -0.0629 | -0.2075 | -0.0745 | -0.2482 | -0.1002 |
| 44 | PPh2H               | -0.2068 | -0.0643 | -0.3821 | -0.2297 | -0.3134 | 0.0982 | -0.4799 | -0.0666 | -0.2159 | -0.0673 | -0.2545 | -0.0916 |
| 45 | (2-F-C6H4)2PhP      | -0.2000 | -0.0698 | -0.3634 | -0.2135 | -0.3066 | 0.0912 | -0.4700 | -0.0512 | -0.2095 | -0.0720 | -0.2530 | -0.0982 |
| 46 | (2-F-C6H4)3P        | -0.2020 | -0.0723 | -0.3655 | -0.2149 | -0.3091 | 0.0896 | -0.4742 | -0.0520 | -0.2121 | -0.0741 | -0.2544 | -0.1006 |
| 47 | (C6F5)Ph2P          | -0.2069 | -0.0858 | -0.3648 | -0.2316 | -0.3145 | 0.0715 | -0.4760 | -0.0774 | -0.2104 | -0.0851 | -0.2566 | -0.1146 |
| 48 | (2,6-F2-C6H3)2PhP   | -0.2044 | -0.0768 | -0.3621 | -0.2230 | -0.3129 | 0.0852 | -0.4681 | -0.0629 | -0.2105 | -0.0807 | -0.2529 | -0.1101 |
| 49 | (2,6-Cl2-C6H3)3P    | -0.1987 | -0.0868 | -0.3511 | -0.2210 | -0.3054 | 0.0728 | -0.4603 | -0.0619 | -0.2077 | -0.0893 | -0.2506 | -0.1173 |
| 50 | (2,6-F2-C6H3)3P     | -0.2068 | -0.0795 | -0.3628 | -0.2226 | -0.3177 | 0.0830 | -0.4782 | -0.0615 | -0.2173 | -0.0819 | -0.2555 | -0.1123 |
| 51 | P(CH2CH(CF3)2)3     | -0.2412 | -0.0363 | -0.4706 | -0.2105 | -0.3843 | 0.1239 | -0.6756 | -0.0422 | -0.2355 | -0.0315 | -0.3597 | -0.0596 |
| 52 | PPh2Cl              | -0.2129 | -0.0870 | -0.3835 | -0.2494 | -0.3241 | 0.0781 | -0.4819 | -0.0833 | -0.2215 | -0.0987 | -0.2597 | -0.1259 |
| 53 | P(C6F5)2Ph          | -0.2249 | -0.0952 | -0.3691 | -0.2401 | -0.3415 | 0.0597 | -0.4874 | -0.0916 | -0.2217 | -0.0929 | -0.2585 | -0.1236 |
| 54 | P((3,5-CF3)2C6H3)3  | -0.2433 | -0.1201 | -0.4065 | -0.2502 | -0.3569 | 0.0329 | -0.5219 | -0.0978 | -0.2321 | -0.1080 | -0.2888 | -0.1264 |
| 55 | P(CH2CF3)3          | -0.2514 | -0.0357 | -0.5061 | -0.2214 | -0.3957 | 0.1132 | -0.7191 | -0.0565 | -0.2431 | -0.0246 | -0.3668 | -0.0604 |
| 56 | P(C6F5)3            | -0.2358 | -0.1067 | -0.3762 | -0.2474 | -0.3636 | 0.0444 | -0.5154 | -0.1012 | -0.2342 | -0.0994 | -0.2630 | -0.1311 |

## Calculations with COSMOthermX

To calculate  $pK_{aH}(\text{MeCN})$  values for bases with COSMOthermX program:

1. Make sure “TZVPD-FINE” has been chosen under “Level” and select your compounds from files under “Load compounds” (Figure S1)
2. All conformers have to be composed into a conformer set; if the names of the files are uniform, e.g. “compound\_c0”, “compound\_c1”, “compound\_H\_c0”, and “compound\_H\_c1”, then the program will do that itself and formed conformer sets will look like in Figure S1

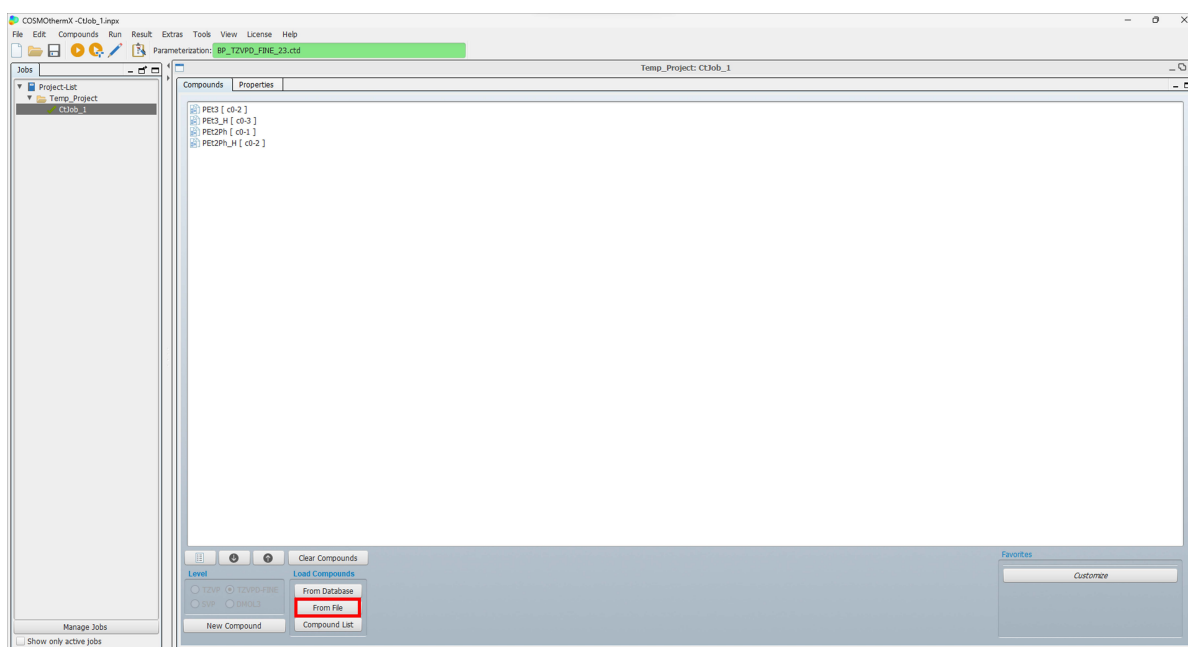

Figure S1. Choose the compounds from files.

3. Select “pKa” under “Properties” tab
4. Choose the job type
5. Select the neutral and ionic forms of a compound and click “Add”; this has to be done for all the compounds in the list (Figure S2)
6. In order to change the parameterization, click on the current parameterization and choose an alternative one under “OLDPARAM” (Figure S3)
7. Click “Run Job (local)”

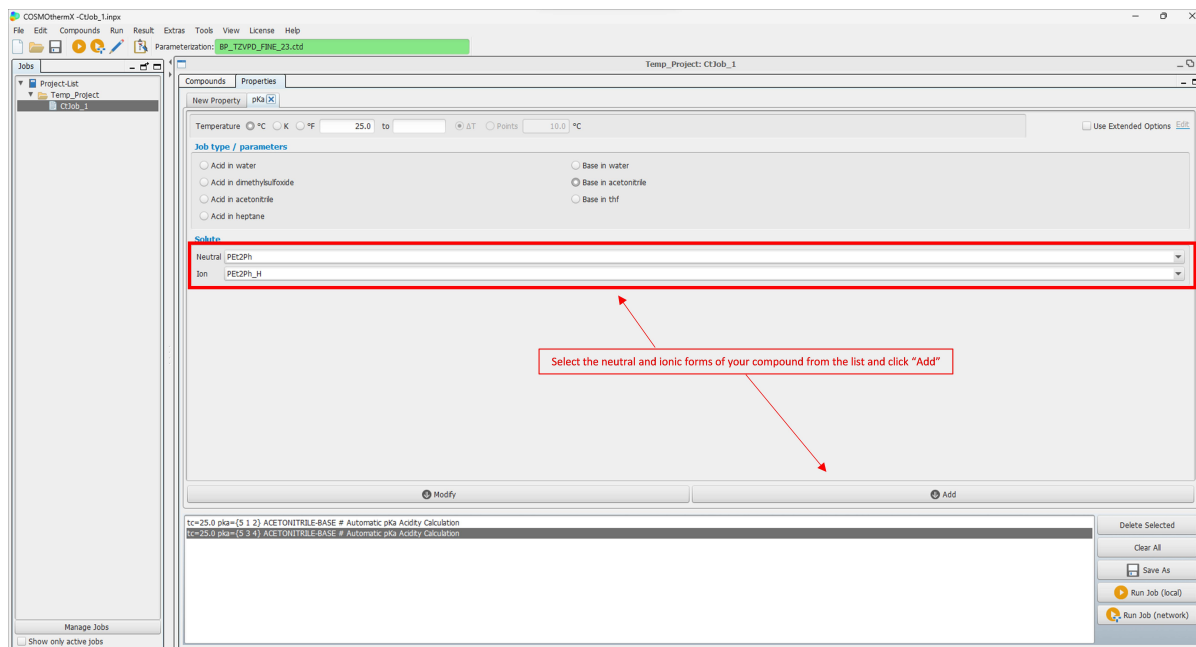

Figure S2. Choose the neutral and ionic form.

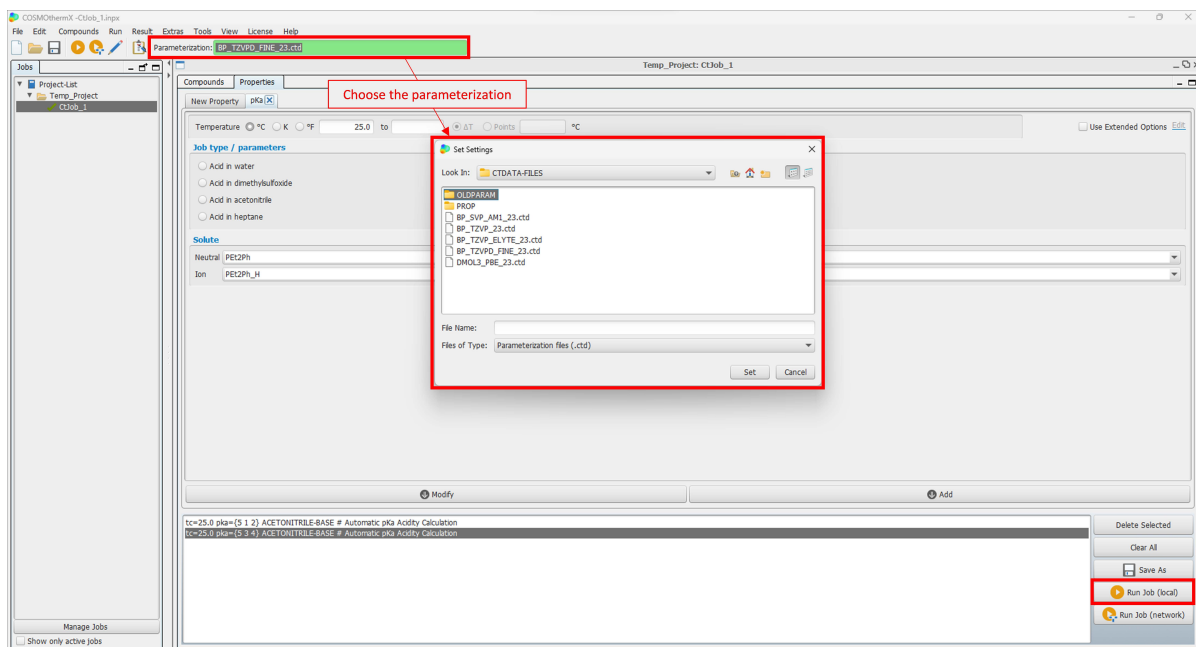

Figure S3. Choose the parameterisation.

- Calculated  $pK_{aH}$  values will appear under ".tab file"; click on the tabs in the bottom row in order to toggle between compounds (Figure S4)



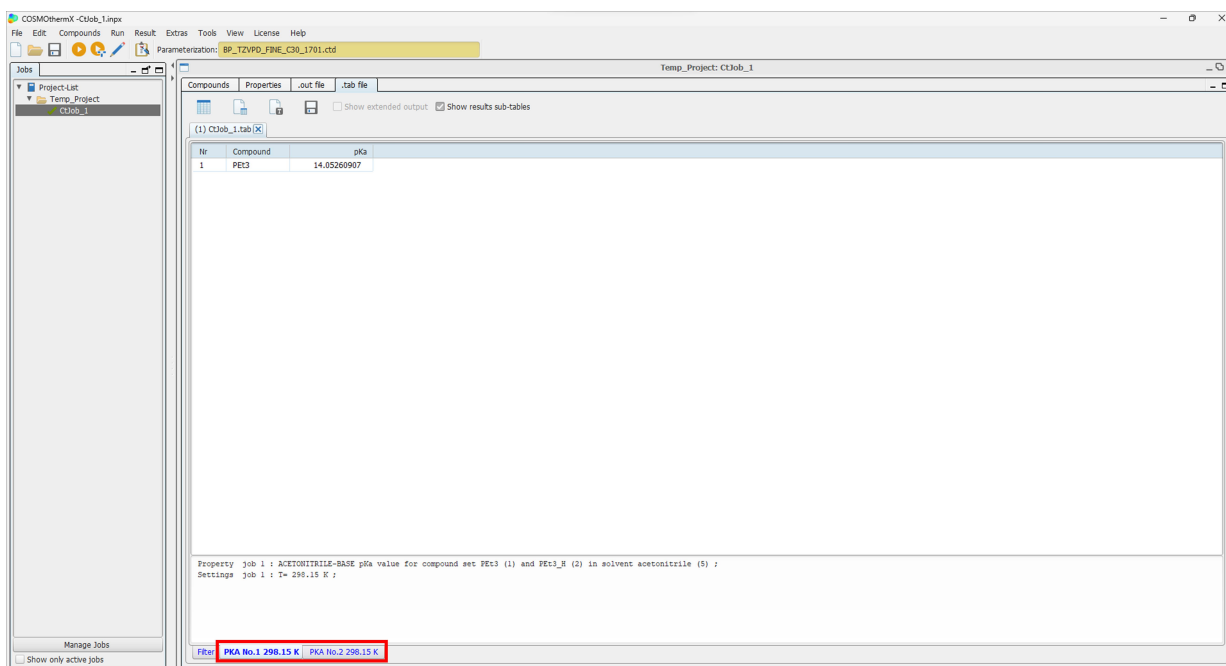

Figure S4. Results for different compounds.

#### 4-(Ph-N=N)-C<sub>6</sub>H<sub>4</sub>-N=P1(dma)<sub>2</sub>Ph

A solution of 4-azidoazobenzene (0.45 g, 2 mmol) in dry toluene (5 mL) was added drop-wise to a stirred solution of P(dma)<sub>2</sub>Ph (0.39 g, 2 mmol) in dry toluene (5 mL) at 0-4 °C under argon atmosphere. The reaction mixture was stirred at 0-4 °C for 1 h and for 4 h at room temperature. After the completion of reaction, the reaction mixture was concentrated under reduced pressure to get the oily product. The crude compound was dissolved in ethylamine (10 mL), and 2 mL of distilled water was added. Crystals formed, and to obtain the pure compound (0.50 g, 1.28 mmol, 64%), the crystals were filtered and washed with a mixture of ethylamine and water.

Data for **4-(Ph-N=N)-C<sub>6</sub>H<sub>4</sub>-N=P1(dma)<sub>2</sub>Ph**: 64%, <sup>1</sup>H NMR (700.1 MHz, CD<sub>3</sub>CN, 25 °C): δ = 7.87-7.90 (m, 2H), 7.78-7.80 (m, 2H), 7.69-7.71 (m, 2H), 7.55-7.58 (m, 1H), 7.49-7.53 (m, 4H), 7.40-7.43 (m, 1H), 6.87-6.89 (m, 2H), 2.67-2.68 (m, 12H) ppm. <sup>13</sup>C{<sup>1</sup>H} NMR (176.0 MHz, CD<sub>3</sub>CN, 25 °C): δ = 157.8, 154.2, 145.2, 133.3 (d, *J*<sub>CP</sub>=8.52 Hz), 132.4 (d, *J*<sub>CP</sub>=2.78 Hz), 130.9, 130.4, 130.1, 129.4 (d, *J*<sub>CP</sub>=13.17 Hz), 125.4 (d, *J*<sub>CP</sub>=2.64 Hz), 124.2 (d, *J*<sub>CP</sub>=18.28 Hz), 122.8, 37.6 (d, *J*<sub>CP</sub>=3.18 Hz) ppm. <sup>31</sup>P{<sup>1</sup>H} NMR (81.0 MHz, CD<sub>3</sub>CN, 25 °C): δ = 21.08 ppm. HRMS (ESI) m/z calcd for C<sub>22</sub>H<sub>26</sub>N<sub>3</sub>P+H: 392.1999 [*M* + H]<sup>+</sup>; found: 392.1990.

<sup>1</sup>H CD<sub>3</sub>CN

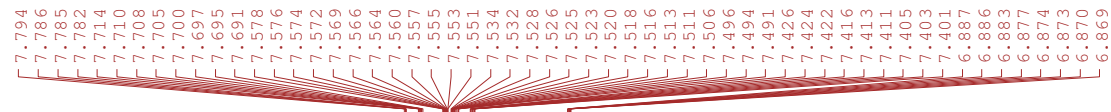

```

Current Data Parameters
NAME      20240506_Sigrid6_34_P(dma)2Ph
EXPNO     1
PROCNO    1

F2 - Acquisition Parameters
Date_     20240507
Time      5:12
INSTRUM   spect
PROBHD    5 mm FAPBBO BB-
PULPROG   zg30
TD         81920
SOLVENT   CD3CN
NS         64
DS         4
SWH       14097.744 Hz
FIDRES    0.172092 Hz
AQ         2.9054294 sec
RG         114
DM         35.467 usec
DE         6.50 usec
TE         298.2 K
D1         3.00000000 sec
TDO        1

----- CHANNEL f1 -----
SFO1      700.0843233 MHz
NUC1       1H
P1         17.20 usec
PLW1       26.00000000 W

F2 - Processing parameters
SI         131072
SF         700.0800267 MHz
WDW        0
SSB        0
LB         0.10 Hz
GB         0
PC         1.00
    
```

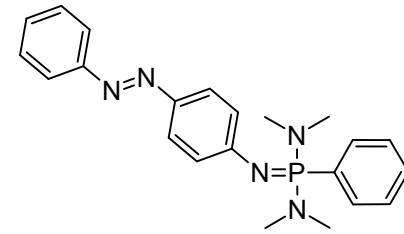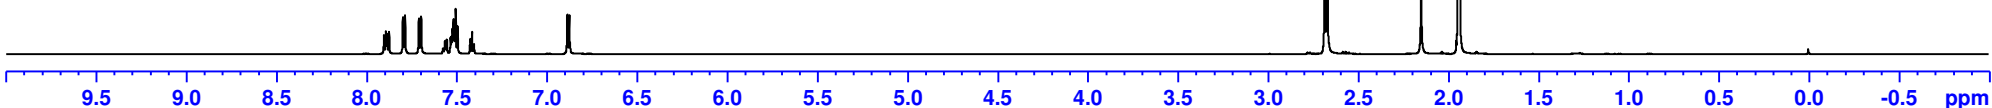

12.09

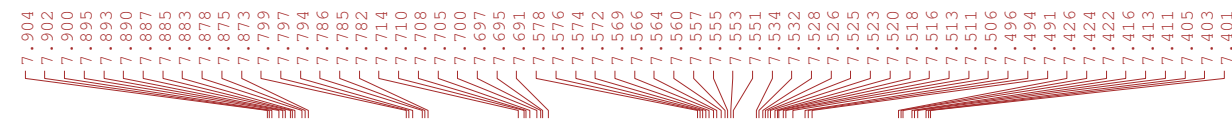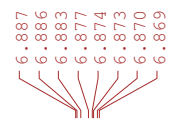

<sup>13</sup>C CD<sub>3</sub>CN

Current Data Parameters  
 NAME 20240506\_SigrIdS\_34\_P(dm)2Ph  
 EXPNO 2  
 PROCNO 1

F2 - Acquisition Parameters  
 Date\_ 20240507  
 Time 10.44  
 INSTRUM spect  
 PROBHD 5 mm PABBO BB-  
 PULPROG zgpg30  
 TD 65536  
 SOLVENT CD<sub>3</sub>CN  
 NS 512  
 DS 4  
 SWH 41666.668 Hz  
 FIDRES 0.635783 Hz  
 AQ 0.7864320 sec  
 RG 2050  
 DW 12.000 usec  
 DE 6.50 usec  
 TE 298.2 K  
 D1 2.0000000 sec  
 D11 0.03000000 sec  
 TDO 1

----- CHANNEL f1 -----  
 SFO1 176.0528587 MHz  
 NUC1 13C  
 P1 17.00 usec  
 PLW1 60.00000000 W  
 ----- CHANNEL f2 -----  
 SFO2 700.0828003 MHz  
 NUC2 1H  
 CPDPRG2 waltz16  
 PCPD2 55.00 usec  
 PLW2 26.0000000 W  
 PLW12 2.54279995 W  
 PLW13 0.91672999 W

F2 - Processing parameters  
 SI 262144  
 SF 176.0350833 MHz  
 WDW EM  
 SSB 0  
 LB 0.50 Hz  
 GB 0  
 PC 1.40

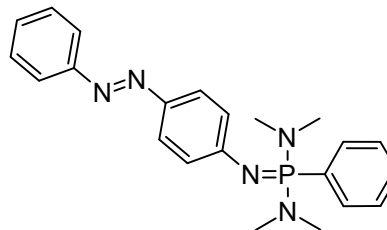

157.85  
 154.16  
 145.20  
 133.36  
 133.31  
 133.31  
 132.46  
 132.44  
 130.90  
 130.37  
 130.12  
 129.98  
 129.52  
 129.44  
 125.44  
 125.43  
 124.26  
 124.16  
 122.83  
 118.30

37.59  
 37.58

1.67  
 1.56  
 1.44  
 1.32  
 1.20  
 1.08  
 0.97

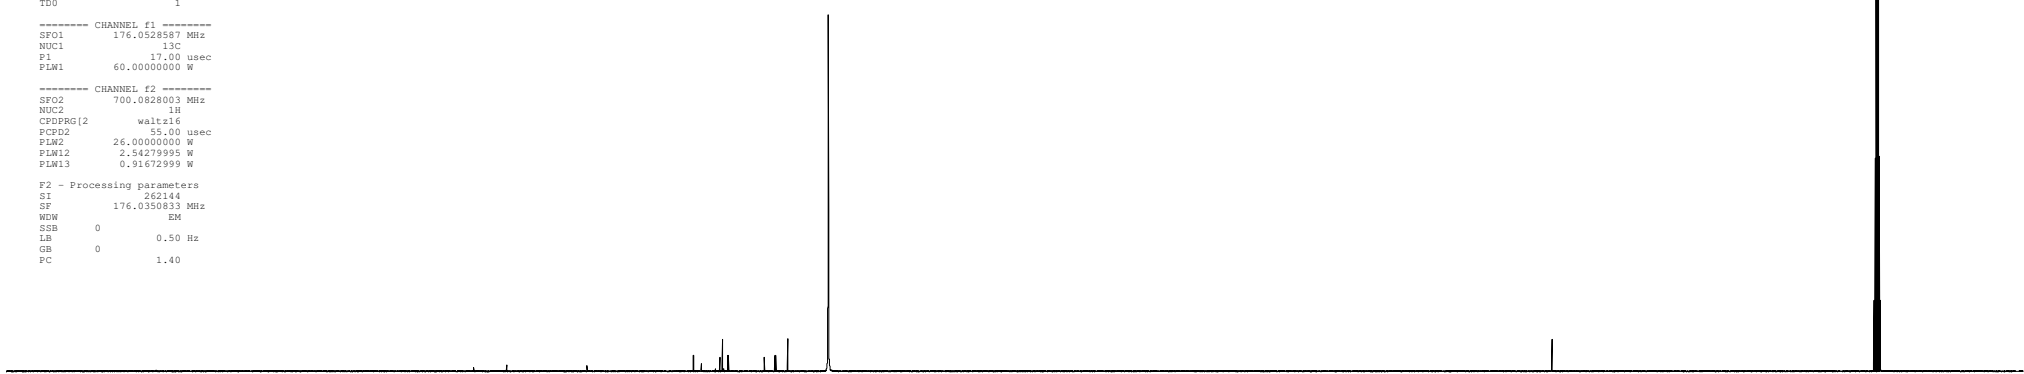

200 190 180 170 160 150 140 130 120 110 100 90 80 70 60 50 40 30 20 10 0 ppm

157.85 154.16 145.20 133.36 133.31 132.46 132.44 130.90 130.37 130.12 129.98 129.52 129.44 125.44 125.43 124.26 124.16 122.83 37.59 37.58

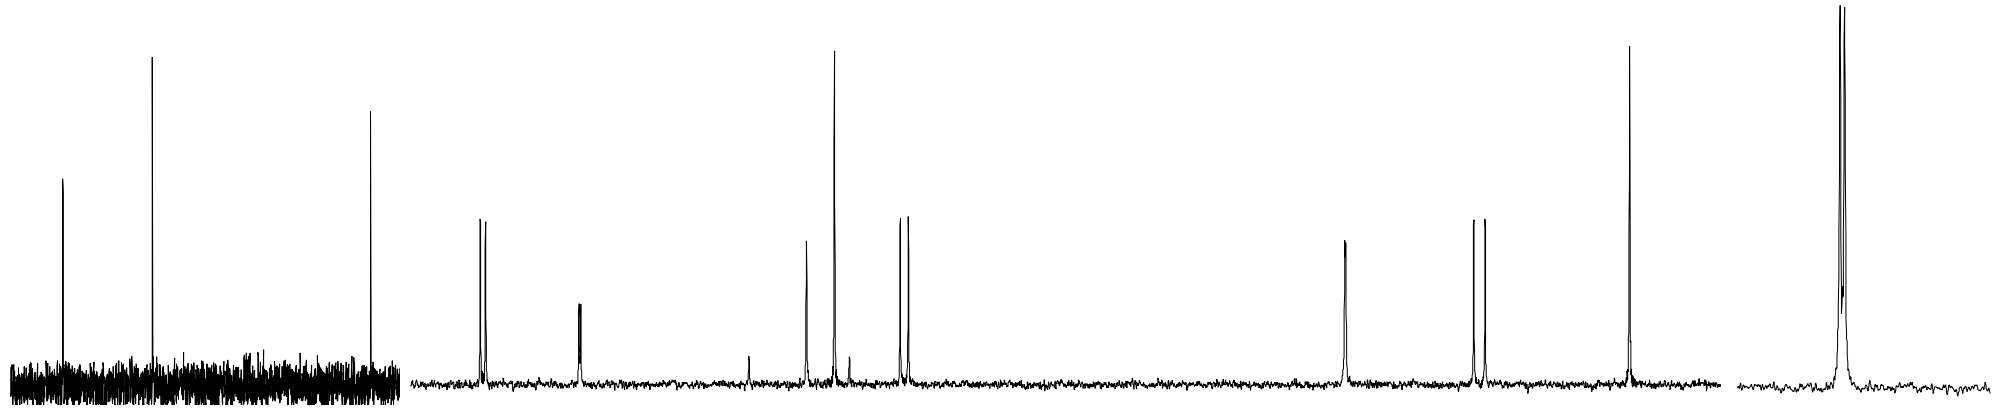

155 150 ppm 133 132 131 130 129 128 127 126 125 124 123 ppm 37.5 ppm

<sup>31</sup>P CD<sub>3</sub>CN

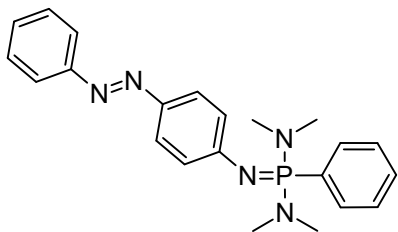

21.08

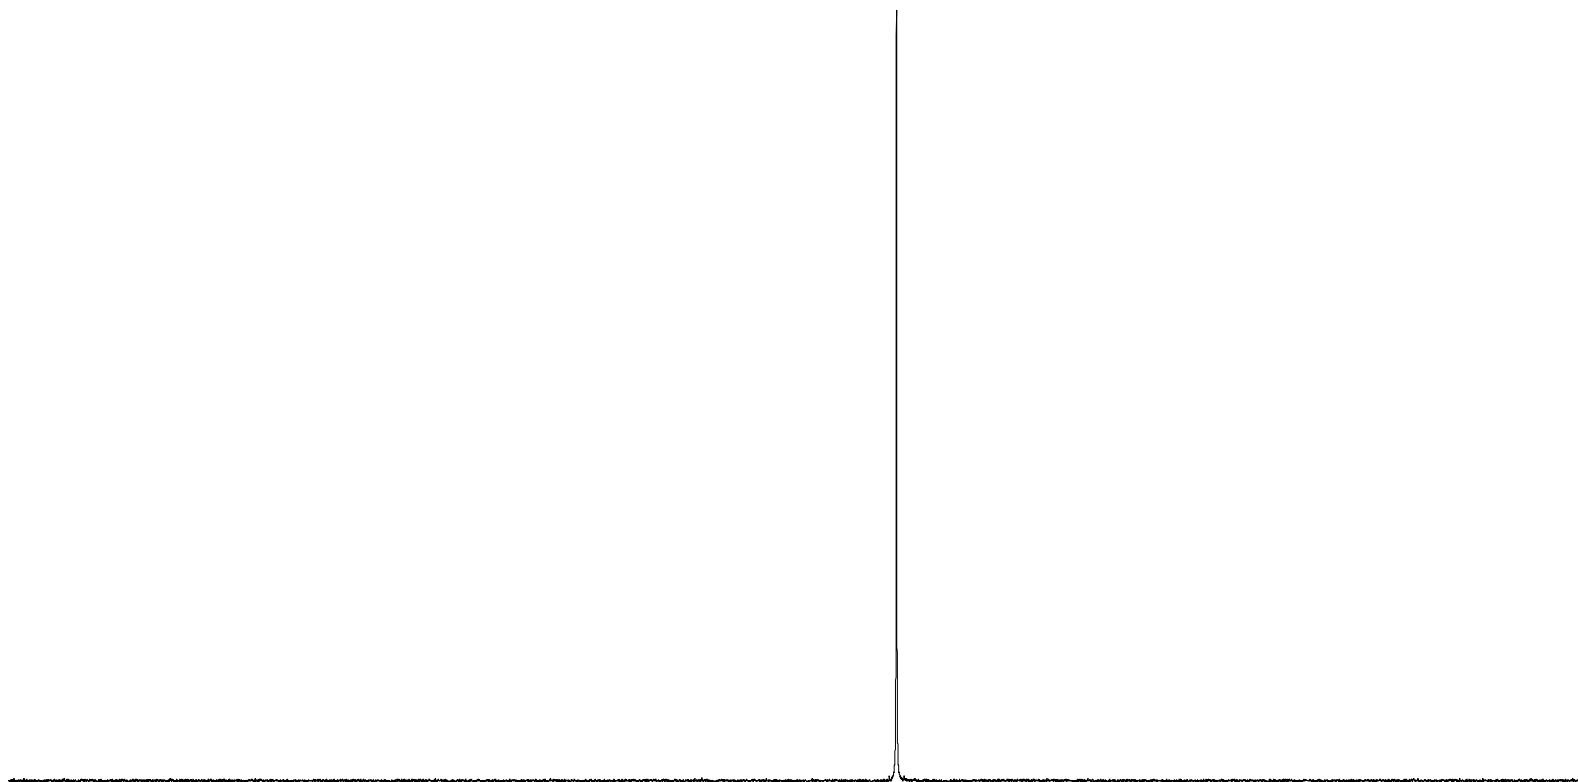

50 45 40 35 30 25 20 15 10 5 0 ppm

Current Data Parameters  
NAME 20240506\_Sigrids\_34\_=P (dma) 2Ph  
EXPNO 4  
PROCNO 1

F2 - Acquisition Parameters  
Date\_ 20240507  
Time 11.09  
INSTRUM spect  
PROBHD 5 mm PABBO BB-  
PULPROG zgpg30  
TD 8500  
SOLVENT CD3CN  
NS 256  
DS 4  
SWH 17006.803 Hz  
FIDRES 2.000800 Hz  
AQ 0.2499000 sec  
RG 2050  
DW 29.400 usec  
DE 6.50 usec  
TE 298.1 K  
D1 0.25000000 sec  
D11 0.03000000 sec  
TD0 1

==== CHANNEL f1 =====  
SFO1 283.4046639 MHz  
NUC1 31P  
P1 26.92 usec  
PLW1 43.00000000 W

==== CHANNEL f2 =====  
SFO2 700.0828003 MHz  
NUC2 1H  
CPDPRG[2] waltz16  
PCPD2 55.00 usec  
PLW2 26.00000000 W  
PLW12 2.54279995 W  
PLW13 0.91672999 W

F2 - Processing parameters  
SI 131072  
SF 283.3975723 MHz  
WDW EM  
SSB 0  
LB 1.00 Hz  
GB 0  
PC 0
